# Supplementary material
Source: PubMed Central journal article supplement (PMC5504421)
Supplement: Supplemental_Table_1.pdf [file Supplemental_Table_1.pdf]

**SUPPLEMENTARY TABLE 1. List of 725 compounds screened in small molecule screen from the NIH Clinical Collection**

| Number | Name                                                   | Pubchem ID | Drug Library Plate | Result                       |
|--------|--------------------------------------------------------|------------|--------------------|------------------------------|
| 1      | 2-(2-Aminoethyl)pyridine                               | 46386941   | NIHCC PLATE_01_A02 | no significant change in PMR |
| 2      | Palonosetron HCl                                       | 46386820   | NIHCC PLATE_01_A03 | no significant change in PMR |
| 3      | Procarbazine HCl                                       | 46386582   | NIHCC PLATE_01_A04 | no significant change in PMR |
| 4      | 1,3,5(10)-Estratrien-3-OL-17-one sulphate, sodium salt | 46386974   | NIHCC PLATE_01_A05 | no significant change in PMR |
| 5      | Tibolone                                               | 46386825   | NIHCC PLATE_01_A06 | no significant change in PMR |
| 6      | Maprotiline HCl,                                       | 46386839   | NIHCC PLATE_01_A07 | no significant change in PMR |
| 7      | Topotecan HCL                                          | 46386667   | NIHCC PLATE_01_A08 | decreased migration          |
| 8      | Sibutramine                                            | 46387014   | NIHCC PLATE_01_A09 | no significant change in PMR |
| 9      | Megestrol Acetate                                      | 46386702   | NIHCC PLATE_01_A10 | no significant change in PMR |
| 10     | Pravastatin                                            | 46386713   | NIHCC PLATE_01_A11 | no significant change in PMR |
| 11     | Brucine                                                | 46386939   | NIHCC PLATE_01_B02 | no significant change in PMR |
| 12     | Fluticasone Propionate                                 | 46386601   | NIHCC PLATE_01_B03 | no significant change in PMR |
| 13     | Oxyphenonium Bromide                                   | 46386961   | NIHCC PLATE_01_B04 | no significant change in PMR |
| 14     | Nialamide                                              | 46386894   | NIHCC PLATE_01_B05 | no significant change in PMR |
| 15     | Exemestane                                             | 46386592   | NIHCC PLATE_01_B06 | no significant change in PMR |
| 16     | Urapidil HCl                                           | 46386851   | NIHCC PLATE_01_B07 | no significant change in PMR |
| 17     | Tryptoline                                             | 46386936   | NIHCC PLATE_01_B08 | no significant change in PMR |
| 18     | Tacrolimus                                             | 46386734   | NIHCC PLATE_01_B09 | no significant change in PMR |
| 19     | Lacidipine                                             | 46386664   | NIHCC PLATE_01_B10 | no significant change in PMR |
| 20     | Monteleukast Na                                        | 46386714   | NIHCC PLATE_01_B11 | no significant change in PMR |
| 21     | 3-Hydroxy-2-methyl-4-pyrone                            | 46386945   | NIHCC PLATE_01_C02 | no significant change in PMR |
| 22     | Balsalazide                                            | 46386828   | NIHCC PLATE_01_C03 | no significant change in PMR |
| 23     | Stiripentol                                            | 46386912   | NIHCC PLATE_01_C04 | no significant change in PMR |
| 24     | SDM25N                                                 | 46387008   | NIHCC PLATE_01_C05 | no significant change in PMR |
| 25     | AM-251                                                 | 46386990   | NIHCC PLATE_01_C06 | no significant change in PMR |
| 26     | Ropivacaine HCl                                        | 46386542   | NIHCC PLATE_01_C07 | no significant change in PMR |
| 27     | Alosetron HCl                                          | 46386816   | NIHCC PLATE_01_C08 | no significant change in PMR |
| 28     | Itraconazole                                           | 46386736   | NIHCC PLATE_01_C09 | no significant change in PMR |
| 29     | Diazepam                                               | 46386554   | NIHCC PLATE_01_C10 | no significant change in PMR |
| 30     | Voriconazole                                           | 46386721   | NIHCC PLATE_01_C11 | no significant change in PMR |
| 31     | Dichloroacetic Acid,                                   | 46386944   | NIHCC PLATE_01_D02 | no significant change in PMR |
| 32     | Valdecoxib                                             | 46386621   | NIHCC PLATE_01_D03 | no significant change in PMR |
| 33     | Haloperidol                                            | 46386806   | NIHCC PLATE_01_D04 | no significant change in PMR |
| 34     | Rutin (Rutoside)                                       | 46386546   | NIHCC PLATE_01_D05 | no significant change in PMR |
| 35     | Clarithromycin                                         | 46386761   | NIHCC PLATE_01_D06 | no significant change in PMR |
| 36     | Nornicotine                                            | 46386896   | NIHCC PLATE_01_D07 | no significant change in PMR |
| 37     | Buflomedil HCl                                         | 46386737   | NIHCC PLATE_01_D08 | no significant change in PMR |
| 38     | Meropenem                                              | 46386666   | NIHCC PLATE_01_D09 | no significant change in PMR |
| 39     | Famciclovir                                            | 46386745   | NIHCC PLATE_01_D10 | no significant change in PMR |
| 40     | Parecoxib                                              | 46386785   | NIHCC PLATE_01_D11 | no significant change in PMR |
| 41     | Benactyzine HCl                                        | 46386942   | NIHCC PLATE_01_E02 | no significant change in PMR |

|    |                                                                                                              |          |                    |                              |
|----|--------------------------------------------------------------------------------------------------------------|----------|--------------------|------------------------------|
| 42 | Loxapine                                                                                                     | 46386931 | NIHCC PLATE_01_E03 | no significant change in PMR |
| 43 | Duloxetine HCl                                                                                               | 46386541 | NIHCC PLATE_01_E04 | no significant change in PMR |
| 44 | Salmeterol                                                                                                   | 46387005 | NIHCC PLATE_01_E05 | no significant change in PMR |
| 45 | Cefaclor                                                                                                     | 46386958 | NIHCC PLATE_01_E06 | no significant change in PMR |
| 46 | Salbutamol Sulfate                                                                                           | 46386798 | NIHCC PLATE_01_E07 | no significant change in PMR |
| 47 | Tosufloxacin Tosylate                                                                                        | 46386743 | NIHCC PLATE_01_E08 | no significant change in PMR |
| 48 | Amfebutamone HCl,                                                                                            | 46386681 | NIHCC PLATE_01_E09 | no significant change in PMR |
| 49 | 5,6-dimethyl-N-[(5-methylfuran-2-yl)methyl]-7-phenyl-4-pyrrolidin-1-ylpyrrolo[2,3-d]pyrimidine-2-carboxamide | 46386683 | NIHCC PLATE_01_E10 | no significant change in PMR |
| 50 | Hyperoside                                                                                                   | 46386811 | NIHCC PLATE_01_E11 | no significant change in PMR |
| 51 | Homoveratrylamine                                                                                            | 46386943 | NIHCC PLATE_01_F02 | no significant change in PMR |
| 52 | 2',3'-Dideoxycytidine                                                                                        | 46386814 | NIHCC PLATE_01_F03 | no significant change in PMR |
| 53 | Vardenafil Citrate                                                                                           | 46386591 | NIHCC PLATE_01_F04 | no significant change in PMR |
| 54 | Dofetilide                                                                                                   | 46386638 | NIHCC PLATE_01_F05 | no significant change in PMR |
| 55 | Nizatidine                                                                                                   | 46386765 | NIHCC PLATE_01_F06 | no significant change in PMR |
| 56 | Terbinafine HCl                                                                                              | 46386583 | NIHCC PLATE_01_F07 | no significant change in PMR |
| 57 | Imatinib Mesylate                                                                                            | 46386639 | NIHCC PLATE_01_F08 | no significant change in PMR |
| 58 | Lamotrigine                                                                                                  | 46386680 | NIHCC PLATE_01_F09 | no significant change in PMR |
| 59 | Pramipexole HCl                                                                                              | 46386558 | NIHCC PLATE_01_F10 | no significant change in PMR |
| 60 | Paroxetine                                                                                                   | 46386650 | NIHCC PLATE_01_F11 | no significant change in PMR |
| 61 | Ornidazole                                                                                                   | 46386947 | NIHCC PLATE_01_G02 | no significant change in PMR |
| 62 | Tocainide                                                                                                    | 46386772 | NIHCC PLATE_01_G03 | no significant change in PMR |
| 63 | SKF 83566                                                                                                    | 46386977 | NIHCC PLATE_01_G04 | no significant change in PMR |
| 64 | N-butyl-3-[6-(4-methoxyphenoxy)pyridazin-3-yl]benzamide                                                      | 46386999 | NIHCC PLATE_01_G05 | no significant change in PMR |
| 65 | Mepirizole                                                                                                   | 46386965 | NIHCC PLATE_01_G06 | no significant change in PMR |
| 66 | Terazosin                                                                                                    | 46386850 | NIHCC PLATE_01_G07 | no significant change in PMR |
| 67 | Vincristine Sulfate                                                                                          | 46386588 | NIHCC PLATE_01_G08 | decreased migration          |
| 68 | Honokiol                                                                                                     | 46386673 | NIHCC PLATE_01_G09 | no significant change in PMR |
| 69 | Pazufloxacin                                                                                                 | 46386755 | NIHCC PLATE_01_G10 | no significant change in PMR |
| 70 | Amiodarone HCl                                                                                               | 46386662 | NIHCC PLATE_01_G11 | no significant change in PMR |
| 71 | Naproxen Sodium                                                                                              | 46386948 | NIHCC PLATE_01_H02 | no significant change in PMR |
| 72 | Pergolide                                                                                                    | 46386979 | NIHCC PLATE_01_H03 | no significant change in PMR |
| 73 | Methyltestosterone                                                                                           | 46386739 | NIHCC PLATE_01_H04 | no significant change in PMR |
| 74 | Glycopyrrolate                                                                                               | 46386646 | NIHCC PLATE_01_H05 | no significant change in PMR |
| 75 | 3-[3,5-Dibromo-4-Hydroxybenzoyl-2-Ethylbenzofuran                                                            | 46386951 | NIHCC PLATE_01_H06 | no significant change in PMR |
| 76 | Diphenoxylate                                                                                                | 46386550 | NIHCC PLATE_01_H07 | no significant change in PMR |
| 77 | Piroxicam                                                                                                    | 46386918 | NIHCC PLATE_01_H08 | no significant change in PMR |
| 78 | Carmofur                                                                                                     | 46386675 | NIHCC PLATE_01_H09 | no significant change in PMR |
| 79 | N-(3-chloro-4-fluorophenyl)-3-[4-(3-methoxyphenoxy)pyrimidin-2-yl]benzamide                                  | 46386611 | NIHCC PLATE_01_H10 | no significant change in PMR |
| 80 | Vindesine Sulfate                                                                                            | 46386586 | NIHCC PLATE_01_H11 | decreased migration          |
| 81 | 1-(2-methoxy-5-methylphenyl)-3-(2-pyridin-4-yl-1H-indol-3-yl)urea                                            | 46386800 | NIHCC PLATE_02_A02 | no significant change in PMR |
| 82 | Azelastine HCl                                                                                               | 46386661 | NIHCC PLATE_02_A03 | no significant change in PMR |

|     |                                                                                                                       |          |                    |                              |
|-----|-----------------------------------------------------------------------------------------------------------------------|----------|--------------------|------------------------------|
| 83  | 1-(4-ethylphenyl)-3-(2-pyridin-3-yl-1H-indol-3-yl)urea                                                                | 46386705 | NIHCC PLATE_02_A04 | no significant change in PMR |
| 84  | Cerivastatin                                                                                                          | 46386572 | NIHCC PLATE_02_A05 | no significant change in PMR |
| 85  | Adenosine, N-(2-hydroxycyclopentyl)-, (1S-trans)                                                                      | 46387015 | NIHCC PLATE_02_A06 | decreased migration          |
| 86  | Homoharringtonine                                                                                                     | 46386877 | NIHCC PLATE_02_A07 | no significant change in PMR |
| 87  | Ezetimibe                                                                                                             | 46386640 | NIHCC PLATE_02_A08 | no significant change in PMR |
| 88  | Olmесartan Medoxomil                                                                                                  | 46386651 | NIHCC PLATE_02_A09 | no significant change in PMR |
| 89  | 8-Azaspiro[4.5]decane-7,9-dione, 8-[2-[[[(2,3-dihydro-1,4-benzodioxin-2-yl)methyl]amino]ethyl]-, monomethanesulfonate | 46387017 | NIHCC PLATE_02_A10 | no significant change in PMR |
| 90  | Nobiletin,                                                                                                            | 46386719 | NIHCC PLATE_02_A11 | no significant change in PMR |
| 91  | N,N'-Diacetyl-1,6-Diaminohexane                                                                                       | 46386869 | NIHCC PLATE_02_B02 | decreased migration          |
| 92  | Cefatrizine Propylene Glycol                                                                                          | 46386659 | NIHCC PLATE_02_B03 | no significant change in PMR |
| 93  | Kitasamycin                                                                                                           | 46386711 | NIHCC PLATE_02_B04 | no significant change in PMR |
| 94  | Enrofloxacin                                                                                                          | 46386889 | NIHCC PLATE_02_B05 | no significant change in PMR |
| 95  | Dehydrocholic Acid                                                                                                    | 46386890 | NIHCC PLATE_02_B06 | no significant change in PMR |
| 96  | 1,1-Dimethyl-4-Phenylpiperazinium Iodide                                                                              | 46387026 | NIHCC PLATE_02_B07 | no significant change in PMR |
| 97  | Alfuzosin                                                                                                             | 46386655 | NIHCC PLATE_02_B08 | no significant change in PMR |
| 98  | Prostaglandin E1                                                                                                      | 46386879 | NIHCC PLATE_02_B09 | no significant change in PMR |
| 99  | Oxymetholone                                                                                                          | 46386778 | NIHCC PLATE_02_B10 | no significant change in PMR |
| 100 | 19-Nortestosterone                                                                                                    | 46386764 | NIHCC PLATE_02_B11 | no significant change in PMR |
| 101 | Ifenprodil                                                                                                            | 46386807 | NIHCC PLATE_02_C02 | no significant change in PMR |
| 102 | Atomoxetine HCl                                                                                                       | 46386643 | NIHCC PLATE_02_C03 | no significant change in PMR |
| 103 | 1-(2-chloro-4-methylphenyl)-3-(2-pyridin-3-yl-1H-indol-3-yl)urea                                                      | 46386710 | NIHCC PLATE_02_C04 | no significant change in PMR |
| 104 | Nicotinamide, 98-92-0                                                                                                 | 46386893 | NIHCC PLATE_02_C05 | no significant change in PMR |
| 105 | Irbesartan                                                                                                            | 46386566 | NIHCC PLATE_02_C06 | no significant change in PMR |
| 106 | Anastrozole                                                                                                           | 46386543 | NIHCC PLATE_02_C07 | no significant change in PMR |
| 107 | Temozolomide                                                                                                          | 46386653 | NIHCC PLATE_02_C08 | no significant change in PMR |
| 108 | Felbamate                                                                                                             | 46386855 | NIHCC PLATE_02_C09 | no significant change in PMR |
| 109 | Olanzapine                                                                                                            | 46386668 | NIHCC PLATE_02_C10 | no significant change in PMR |
| 110 | Latanoprost                                                                                                           | 46386728 | NIHCC PLATE_02_C11 | no significant change in PMR |
| 111 | Toremifine Citrate                                                                                                    | 46386786 | NIHCC PLATE_02_D02 | no significant change in PMR |
| 112 | Bisoprolol Fumarate                                                                                                   | 46386635 | NIHCC PLATE_02_D03 | no significant change in PMR |
| 113 | Rimcazole                                                                                                             | 46387003 | NIHCC PLATE_02_D04 | no significant change in PMR |
| 114 | Sulfasalazine                                                                                                         | 46386548 | NIHCC PLATE_02_D05 | no significant change in PMR |
| 115 | Tinidazole                                                                                                            | 46387025 | NIHCC PLATE_02_D06 | no significant change in PMR |
| 116 | Vecuronium Bromide                                                                                                    | 46386876 | NIHCC PLATE_02_D07 | no significant change in PMR |
| 117 | Nitrazepam                                                                                                            | 46386691 | NIHCC PLATE_02_D08 | no significant change in PMR |
| 118 | Clobenpropit                                                                                                          | 46387016 | NIHCC PLATE_02_D09 | no significant change in PMR |
| 119 | Testosterone                                                                                                          | 46501387 | NIHCC PLATE_02_D10 | no significant change in PMR |
| 120 | Docetaxel                                                                                                             | 46386672 | NIHCC PLATE_02_D11 | no significant change in PMR |
| 121 | Lobeline HCl                                                                                                          | 46386920 | NIHCC PLATE_02_E02 | no significant change in PMR |
| 122 | Tiagabine HCl                                                                                                         | 46386642 | NIHCC PLATE_02_E03 | no significant change in PMR |

|     |                                                                                                               |          |                    |                              |
|-----|---------------------------------------------------------------------------------------------------------------|----------|--------------------|------------------------------|
| 123 | Levetiracetam                                                                                                 | 46386557 | NIHCC PLATE_02_E04 | no significant change in PMR |
| 124 | Phenothiazine                                                                                                 | 46386888 | NIHCC PLATE_02_E05 | no significant change in PMR |
| 125 | 1-Benzylimidazole                                                                                             | 46386891 | NIHCC PLATE_02_E06 | no significant change in PMR |
| 126 | Lansoprazole                                                                                                  | 46386562 | NIHCC PLATE_02_E07 | no significant change in PMR |
| 127 | Pemoline                                                                                                      | 46386687 | NIHCC PLATE_02_E08 | no significant change in PMR |
| 128 | Mevastatin                                                                                                    | 46386660 | NIHCC PLATE_02_E09 | no significant change in PMR |
| 129 | Argatroban                                                                                                    | 46386718 | NIHCC PLATE_02_E10 | no significant change in PMR |
| 130 | Zolmitriptan                                                                                                  | 46386880 | NIHCC PLATE_02_E11 | decreased migration          |
| 131 | Droperidol                                                                                                    | 46386863 | NIHCC PLATE_02_F02 | no significant change in PMR |
| 132 | Halometazone Monohydrate                                                                                      | 46386633 | NIHCC PLATE_02_F03 | no significant change in PMR |
| 133 | Zolpidem Tartrate                                                                                             | 46386567 | NIHCC PLATE_02_F04 | no significant change in PMR |
| 134 | Loteprednol Etabonate                                                                                         | 46386647 | NIHCC PLATE_02_F05 | no significant change in PMR |
| 135 | N-benzyl-4-[6-(3-methoxyphenoxy)pyridazin-3-yl]benzamide                                                      | 46386954 | NIHCC PLATE_02_F06 | no significant change in PMR |
| 136 | R(+)-SCH-23390 hydrochloride                                                                                  | 46387007 | NIHCC PLATE_02_F07 | no significant change in PMR |
| 137 | Dehydroepiandrosterone                                                                                        | 46387028 | NIHCC PLATE_02_F08 | no significant change in PMR |
| 138 | Stanozolol                                                                                                    | 46386608 | NIHCC PLATE_02_F09 | no significant change in PMR |
| 139 | Mestanolone                                                                                                   | 46386759 | NIHCC PLATE_02_F10 | no significant change in PMR |
| 140 | 2',3'-Dideoxyinosine                                                                                          | 46386730 | NIHCC PLATE_02_F11 | no significant change in PMR |
| 141 | Cefpodoxime Proxetil                                                                                          | 46386731 | NIHCC PLATE_02_G02 | no significant change in PMR |
| 142 | Perospirone HCl                                                                                               | 46386671 | NIHCC PLATE_02_G03 | no significant change in PMR |
| 143 | Rofecoxib                                                                                                     | 46386634 | NIHCC PLATE_02_G04 | no significant change in PMR |
| 144 | 7-Nitroindazole                                                                                               | 46387020 | NIHCC PLATE_02_G05 | no significant change in PMR |
| 145 | Thiophene, 5-bromo-2-(4-fluorophenyl)-3-[4-(methylsulfonyl)phenyl]                                            | 46387010 | NIHCC PLATE_02_G06 | no significant change in PMR |
| 146 | 6-Aminoindazole                                                                                               | 46386887 | NIHCC PLATE_02_G07 | no significant change in PMR |
| 147 | Orlistat                                                                                                      | 46386654 | NIHCC PLATE_02_G08 | no significant change in PMR |
| 148 | Actarit                                                                                                       | 46386663 | NIHCC PLATE_02_G09 | no significant change in PMR |
| 149 | Naftopidil                                                                                                    | 46386715 | NIHCC PLATE_02_G10 | no significant change in PMR |
| 150 | Triclabendazole                                                                                               | 46386738 | NIHCC PLATE_02_G11 | no significant change in PMR |
| 151 | Pentoxifylline                                                                                                | 46386861 | NIHCC PLATE_02_H02 | no significant change in PMR |
| 152 | Idarubicin HCl                                                                                                | 46386733 | NIHCC PLATE_02_H03 | no significant change in PMR |
| 153 | Methanesulfonamide, N-[4-[[1-[2-(6-methyl-2-pyridinyl)ethyl]-4-piperidinyl]carbonyl]phenyl]-, dihydrochloride | 46387000 | NIHCC PLATE_02_H04 | no significant change in PMR |
| 154 | RU 24969                                                                                                      | 46387004 | NIHCC PLATE_02_H05 | no significant change in PMR |
| 155 | Artesunate                                                                                                    | 46386645 | NIHCC PLATE_02_H06 | decreased migration          |
| 156 | Cladribine                                                                                                    | 46386544 | NIHCC PLATE_02_H07 | no significant change in PMR |
| 157 | Nimetazepam                                                                                                   | 46386768 | NIHCC PLATE_02_H08 | no significant change in PMR |
| 158 | SibutramineHCl                                                                                                | 46386610 | NIHCC PLATE_02_H09 | no significant change in PMR |
| 159 | Fluperlapine                                                                                                  | 46386904 | NIHCC PLATE_02_H10 | no significant change in PMR |
| 160 | Enalaprilat                                                                                                   | 46386741 | NIHCC PLATE_02_H11 | no significant change in PMR |
| 161 | Atracurium Besylate                                                                                           | 46386822 | NIHCC PLATE_03_A02 | no significant change in PMR |
| 162 | Cephalexin monohydrate                                                                                        | 46386774 | NIHCC PLATE_03_A03 | no significant change in PMR |
| 163 | Amisulpride                                                                                                   | 46386656 | NIHCC PLATE_03_A04 | no significant change in PMR |
| 164 | Amlexanox                                                                                                     | 46386726 | NIHCC PLATE_03_A05 | no significant change in PMR |

|     |                                                                                                      |          |                    |                              |
|-----|------------------------------------------------------------------------------------------------------|----------|--------------------|------------------------------|
| 165 | Zafirlukast                                                                                          | 46386595 | NIHCC PLATE_03_A06 | no significant change in PMR |
| 166 | Valaciclovir HCl                                                                                     | 46386762 | NIHCC PLATE_03_A07 | no significant change in PMR |
| 167 | Finasteride                                                                                          | 46386559 | NIHCC PLATE_03_A08 | no significant change in PMR |
| 168 | Ranolazine dihydrochloride                                                                           | 46386552 | NIHCC PLATE_03_A09 | no significant change in PMR |
| 169 | Progesterone                                                                                         | 46386909 | NIHCC PLATE_03_A10 | no significant change in PMR |
| 170 | Itavastatin Ca                                                                                       | 46386827 | NIHCC PLATE_03_A11 | no significant change in PMR |
| 171 | Ramipril                                                                                             | 46386770 | NIHCC PLATE_03_B02 | no significant change in PMR |
| 172 | Olopatadine HCl                                                                                      | 46386826 | NIHCC PLATE_03_B03 | no significant change in PMR |
| 173 | Zaleplon                                                                                             | 46386657 | NIHCC PLATE_03_B04 | no significant change in PMR |
| 174 | Esmolol HCl                                                                                          | 46386551 | NIHCC PLATE_03_B05 | no significant change in PMR |
| 175 | Lamivudine                                                                                           | 46386600 | NIHCC PLATE_03_B06 | no significant change in PMR |
| 176 | Nitrendipine                                                                                         | 46386549 | NIHCC PLATE_03_B07 | no significant change in PMR |
| 177 | Repaglinide                                                                                          | 46386564 | NIHCC PLATE_03_B08 | no significant change in PMR |
| 178 | Tropistron HCl                                                                                       | 46386594 | NIHCC PLATE_03_B09 | no significant change in PMR |
| 179 | Cinanserin                                                                                           | 46386801 | NIHCC PLATE_03_B10 | no significant change in PMR |
| 180 | ( $\pm$ )-Vesamicol hydrochloride                                                                    | 46386799 | NIHCC PLATE_03_B11 | no significant change in PMR |
| 181 | Altanserin                                                                                           | 46386989 | NIHCC PLATE_03_C02 | no significant change in PMR |
| 182 | Clofazimine                                                                                          | 46386952 | NIHCC PLATE_03_C03 | no significant change in PMR |
| 183 | Mirtazapine                                                                                          | 46386716 | NIHCC PLATE_03_C04 | no significant change in PMR |
| 184 | Zeranol                                                                                              | 46386627 | NIHCC PLATE_03_C05 | no significant change in PMR |
| 185 | Valsartan                                                                                            | 46386599 | NIHCC PLATE_03_C06 | no significant change in PMR |
| 186 | (Desloratadine) 8-Chloro-11-piperidin-4-ylidene-6,11-dihydro-5H-benzo[5,6]cyclohepta[1,2-b]pyridine, | 46386563 | NIHCC PLATE_03_C07 | no significant change in PMR |
| 187 | Zacopride                                                                                            | 46386978 | NIHCC PLATE_03_C08 | no significant change in PMR |
| 188 | Escitalopram Oxalate                                                                                 | 46386725 | NIHCC PLATE_03_C09 | no significant change in PMR |
| 189 | Prazosin                                                                                             | 46386845 | NIHCC PLATE_03_C10 | no significant change in PMR |
| 190 | Ketotifen Fumarate                                                                                   | 46386834 | NIHCC PLATE_03_C11 | no significant change in PMR |
| 191 | Topiramate                                                                                           | 46386619 | NIHCC PLATE_03_D02 | no significant change in PMR |
| 192 | Trileptal                                                                                            | 46386767 | NIHCC PLATE_03_D03 | no significant change in PMR |
| 193 | VenlafaxineHCl                                                                                       | 46386590 | NIHCC PLATE_03_D04 | no significant change in PMR |
| 194 | Pterostilbene                                                                                        | 46386623 | NIHCC PLATE_03_D05 | no significant change in PMR |
| 195 | Alprazolam                                                                                           | 46386679 | NIHCC PLATE_03_D06 | no significant change in PMR |
| 196 | Nafadotride                                                                                          | 46387001 | NIHCC PLATE_03_D07 | no significant change in PMR |
| 197 | 3-hydroxy-1,2-dimethyl-4(1H)-pyridone                                                                | 46386865 | NIHCC PLATE_03_D08 | no significant change in PMR |
| 198 | MoxonidineHCl                                                                                        | 46386777 | NIHCC PLATE_03_D09 | no significant change in PMR |
| 199 | Granisetron HCl                                                                                      | 46386545 | NIHCC PLATE_03_D10 | no significant change in PMR |
| 200 | Chlorpheniramine                                                                                     | 46386872 | NIHCC PLATE_03_D11 | no significant change in PMR |
| 201 | Nimodipine                                                                                           | 46386964 | NIHCC PLATE_03_E02 | no significant change in PMR |
| 202 | Azasetron                                                                                            | 46386991 | NIHCC PLATE_03_E03 | no significant change in PMR |
| 203 | Ampiroxicam                                                                                          | 46386688 | NIHCC PLATE_03_E04 | no significant change in PMR |
| 204 | Milrinone                                                                                            | 46386629 | NIHCC PLATE_03_E05 | no significant change in PMR |
| 205 | Glycine, N-[2-[(acetylthio)methyl]-1-oxo-3-phenylpropyl]-,phenylmethyl ester                         | 46386930 | NIHCC PLATE_03_E06 | no significant change in PMR |

|     |                                                                                                                      |          |                    |                              |
|-----|----------------------------------------------------------------------------------------------------------------------|----------|--------------------|------------------------------|
| 206 | 6-[[3-(4-ethoxyphenyl)-1,2,4-oxadiazol-5-yl]methylsulfanyl]-7-(furan-2-ylmethyl)-[1,3]dioxolo[4,5-g]quinazolin-8-one | 46386648 | NIHCC PLATE_03_E07 | no significant change in PMR |
| 207 | Mestranol                                                                                                            | 46386940 | NIHCC PLATE_03_E08 | no significant change in PMR |
| 208 | Nelfinavir Mesylate                                                                                                  | 46386712 | NIHCC PLATE_03_E09 | no significant change in PMR |
| 209 | Capsaicin                                                                                                            | 46386797 | NIHCC PLATE_03_E10 | no significant change in PMR |
| 210 | Piribedil                                                                                                            | 46386844 | NIHCC PLATE_03_E11 | no significant change in PMR |
| 211 | Aripiprazole                                                                                                         | 46386763 | NIHCC PLATE_03_F02 | no significant change in PMR |
| 212 | Dactinomycin                                                                                                         | 46386883 | NIHCC PLATE_03_F03 | no significant change in PMR |
| 213 | Esomeprazole Mg                                                                                                      | 46386556 | NIHCC PLATE_03_F04 | no significant change in PMR |
| 214 | Bicalutamide                                                                                                         | 46386630 | NIHCC PLATE_03_F05 | no significant change in PMR |
| 215 | (-)-Cotinine                                                                                                         | 46386857 | NIHCC PLATE_03_F06 | no significant change in PMR |
| 216 | Rabeprazole                                                                                                          | 46386636 | NIHCC PLATE_03_F07 | no significant change in PMR |
| 217 | 4-[6-(3-methoxyphenoxy)pyridazin-3-yl]-N-(3-methylbutyl)benzamide                                                    | 46386937 | NIHCC PLATE_03_F08 | no significant change in PMR |
| 218 | Cilastatin Na                                                                                                        | 46386570 | NIHCC PLATE_03_F09 | no significant change in PMR |
| 219 | Sumatriptan Succinate                                                                                                | 46386597 | NIHCC PLATE_03_F10 | no significant change in PMR |
| 220 | TFMPP                                                                                                                | 46386913 | NIHCC PLATE_03_F11 | no significant change in PMR |
| 221 | Guanidine, N-cyano-N'-(1,1-dimethylpropyl)-N''-3-pyridinyl                                                           | 46386997 | NIHCC PLATE_03_G02 | no significant change in PMR |
| 222 | Tremulacin                                                                                                           | 46386886 | NIHCC PLATE_03_G03 | no significant change in PMR |
| 223 | Telmisartan                                                                                                          | 46386620 | NIHCC PLATE_03_G04 | no significant change in PMR |
| 224 | Rizatriptan Benzoate                                                                                                 | 46386632 | NIHCC PLATE_03_G05 | no significant change in PMR |
| 225 | Duloxetine                                                                                                           | 46386929 | NIHCC PLATE_03_G06 | no significant change in PMR |
| 226 | Viramune                                                                                                             | 46386569 | NIHCC PLATE_03_G07 | no significant change in PMR |
| 227 | Letrozole                                                                                                            | 46386665 | NIHCC PLATE_03_G08 | no significant change in PMR |
| 228 | Stavudine                                                                                                            | 46386709 | NIHCC PLATE_03_G09 | no significant change in PMR |
| 229 | Riluzole                                                                                                             | 46386847 | NIHCC PLATE_03_G10 | no significant change in PMR |
| 230 | d-3-Methoxy-N-methylmorphinan hydrobromide                                                                           | 46386932 | NIHCC PLATE_03_G11 | no significant change in PMR |
| 231 | Triptolide                                                                                                           | 46386571 | NIHCC PLATE_03_H02 | no significant change in PMR |
| 232 | Levofloxacin                                                                                                         | 46386771 | NIHCC PLATE_03_H03 | no significant change in PMR |
| 233 | Ethylestrenol                                                                                                        | 46386573 | NIHCC PLATE_03_H04 | no significant change in PMR |
| 234 | Moclobemide (4-Chloro-N-(2-morpholin-4-yl-ethyl)-benzamide)                                                          | 46386631 | NIHCC PLATE_03_H05 | no significant change in PMR |
| 235 | Midazolam HCl                                                                                                        | 46386603 | NIHCC PLATE_03_H06 | no significant change in PMR |
| 236 | Xanthinol Nicotinate                                                                                                 | 46387024 | NIHCC PLATE_03_H07 | no significant change in PMR |
| 237 | N-Ethyl-o-crotonotoluidide                                                                                           | 46386684 | NIHCC PLATE_03_H08 | no significant change in PMR |
| 238 | Mosapride Citrate                                                                                                    | 46386693 | NIHCC PLATE_03_H09 | no significant change in PMR |
| 239 | Phenelzine Sulfate Salt                                                                                              | 46386907 | NIHCC PLATE_03_H10 | no significant change in PMR |
| 240 | Picrotin - Picrotoxinin                                                                                              | 46386843 | NIHCC PLATE_03_H11 | no significant change in PMR |
| 241 | Modafinil                                                                                                            | 46386605 | NIHCC PLATE_04_A02 | no significant change in PMR |
| 242 | Anagrelide HCl                                                                                                       | 46386622 | NIHCC PLATE_04_A03 | no significant change in PMR |
| 243 | Lomerizine DiHCl                                                                                                     | 46386707 | NIHCC PLATE_04_A04 | decreased migration          |
| 244 | 1-(5-chloro-2-pyridin-4-yl-1H-indol-3-yl)-3-(3,5-dimethoxyphenyl)urea                                                | 46386810 | NIHCC PLATE_04_A05 | no significant change in PMR |
| 245 | Loxiporfen Sodium                                                                                                    | 46386612 | NIHCC PLATE_04_A06 | no significant change in PMR |
| 246 | Pizotyline                                                                                                           | 46386908 | NIHCC PLATE_04_A07 | no significant change in PMR |

|     |                                                                             |          |                    |                              |
|-----|-----------------------------------------------------------------------------|----------|--------------------|------------------------------|
| 247 | Formoterol Fumarate Dihydrate                                               | 46386732 | NIHCC PLATE_04_A08 | no significant change in PMR |
| 248 | Benzeneacetic acid, 2-[(2,6-dichlorophenyl)amino]-, monosodium salt         | 46386927 | NIHCC PLATE_04_A09 | no significant change in PMR |
| 249 | Pramipexole                                                                 | 46386856 | NIHCC PLATE_04_A10 | no significant change in PMR |
| 250 | Losartan                                                                    | 46386652 | NIHCC PLATE_04_A11 | no significant change in PMR |
| 251 | Paroxetine                                                                  | 46386841 | NIHCC PLATE_04_B02 | no significant change in PMR |
| 252 | Pancuronium                                                                 | 46386853 | NIHCC PLATE_04_B03 | decreased migration          |
| 253 | Tacrine [9-Amino-1,2,3,4-Tetrahydroacridine HCl]                            | 46386852 | NIHCC PLATE_04_B04 | no significant change in PMR |
| 254 | D-Cycloserine                                                               | 46386864 | NIHCC PLATE_04_B05 | no significant change in PMR |
| 255 | Galanthamine                                                                | 46386805 | NIHCC PLATE_04_B06 | no significant change in PMR |
| 256 | Milnacipran                                                                 | 46386905 | NIHCC PLATE_04_B07 | no significant change in PMR |
| 257 | Trazodone HCl                                                               | 46386915 | NIHCC PLATE_04_B08 | decreased migration          |
| 258 | Metronidazole                                                               | 46386860 | NIHCC PLATE_04_B09 | no significant change in PMR |
| 259 | Tetraethylthiuram Disulfide                                                 | 46386898 | NIHCC PLATE_04_B10 | no significant change in PMR |
| 260 | Tolterodine Tartrate                                                        | 46386674 | NIHCC PLATE_04_B11 | no significant change in PMR |
| 261 | L-Ornithine, N5-[imino(methylamino)methyl]                                  | 46386919 | NIHCC PLATE_04_C02 | no significant change in PMR |
| 262 | (+)-3-Hydroxy-N-Methylmorphinan D-Tartrate                                  | 46386873 | NIHCC PLATE_04_C03 | no significant change in PMR |
| 263 | 5-fluoro-2-pyrimidone                                                       | 46386867 | NIHCC PLATE_04_C04 | no significant change in PMR |
| 264 | Donepezil                                                                   | 46386644 | NIHCC PLATE_04_C05 | no significant change in PMR |
| 265 | Saquinavir Mesylate                                                         | 46386596 | NIHCC PLATE_04_C06 | no significant change in PMR |
| 266 | Tegaserod Maleate                                                           | 46386624 | NIHCC PLATE_04_C07 | decreased migration          |
| 267 | diphenylcyclopropanone                                                      | 46386897 | NIHCC PLATE_04_C08 | no significant change in PMR |
| 268 | Tadalafil                                                                   | 46386604 | NIHCC PLATE_04_C09 | no significant change in PMR |
| 269 | Diphenhydramine hydrochloride                                               | 46386874 | NIHCC PLATE_04_C10 | no significant change in PMR |
| 270 | Nifekalant HCl                                                              | 46386697 | NIHCC PLATE_04_C11 | no significant change in PMR |
| 271 | Nalbuphine                                                                  | 46386933 | NIHCC PLATE_04_D02 | no significant change in PMR |
| 272 | 1H-Cyclopenta[b]quinolin-9-amine, 2,3,5,6,7,8-hexahydro-, monohydrochloride | 46386925 | NIHCC PLATE_04_D03 | no significant change in PMR |
| 273 | Fluvoxamine                                                                 | 46386804 | NIHCC PLATE_04_D04 | no significant change in PMR |
| 274 | Citalopram                                                                  | 46386617 | NIHCC PLATE_04_D05 | no significant change in PMR |
| 275 | Bifemelane                                                                  | 46386922 | NIHCC PLATE_04_D06 | no significant change in PMR |
| 276 | Loratadine                                                                  | 46386837 | NIHCC PLATE_04_D07 | no significant change in PMR |
| 277 | Mesoridazine                                                                | 46386921 | NIHCC PLATE_04_D08 | no significant change in PMR |
| 278 | Famotidine                                                                  | 46386903 | NIHCC PLATE_04_D09 | no significant change in PMR |
| 279 | Irinotecan HCl                                                              | 46386616 | NIHCC PLATE_04_D10 | decreased migration          |
| 280 | Rifapentine                                                                 | 46386637 | NIHCC PLATE_04_D11 | no significant change in PMR |
| 281 | AM 404                                                                      | 46386792 | NIHCC PLATE_04_E02 | no significant change in PMR |
| 282 | Roxatidine Acetate HCl                                                      | 46386565 | NIHCC PLATE_04_E03 | no significant change in PMR |
| 283 | Vinorelbine Bitartrate                                                      | 46386815 | NIHCC PLATE_04_E04 | decreased migration          |
| 284 | Indatraline                                                                 | 46386808 | NIHCC PLATE_04_E05 | no significant change in PMR |
| 285 | Ticlopidine HCl                                                             | 46386576 | NIHCC PLATE_04_E06 | no significant change in PMR |
| 286 | Physostigmine                                                               | 46386842 | NIHCC PLATE_04_E07 | no significant change in PMR |
| 287 | Pantoprazole Sodium Salt                                                    | 46386609 | NIHCC PLATE_04_E08 | no significant change in PMR |

|     |                                                                             |          |                    |                              |
|-----|-----------------------------------------------------------------------------|----------|--------------------|------------------------------|
| 288 | N-(4-bromophenyl)-3-[4-(3-methoxyphenoxy)pyrimidin-2-yl]benzamide           | 46386614 | NIHCC PLATE_04_E09 | no significant change in PMR |
| 289 | Glimepiride                                                                 | 46386690 | NIHCC PLATE_04_E10 | no significant change in PMR |
| 290 | Huperzine A                                                                 | 46386885 | NIHCC PLATE_04_E11 | no significant change in PMR |
| 291 | Pilocarpine HCl                                                             | 46386789 | NIHCC PLATE_04_F02 | no significant change in PMR |
| 292 | Amiloride [Pyrazinecarboxamide, 3,5-diamino-N-(aminoiminomethyl)-6-chloro   | 46386846 | NIHCC PLATE_04_F03 | no significant change in PMR |
| 293 | Naltrindole                                                                 | 46386854 | NIHCC PLATE_04_F04 | no significant change in PMR |
| 294 | Quetiapine Hemifurate                                                       | 46386812 | NIHCC PLATE_04_F05 | no significant change in PMR |
| 295 | Beta-Estradiol                                                              | 46386902 | NIHCC PLATE_04_F06 | no significant change in PMR |
| 296 | 5-Amino-2-hydroxy-benzoic acid                                              | 46386870 | NIHCC PLATE_04_F07 | no significant change in PMR |
| 297 | Risperidone                                                                 | 46386613 | NIHCC PLATE_04_F08 | no significant change in PMR |
| 298 | Ethinylestradiol                                                            | 46386858 | NIHCC PLATE_04_F09 | no significant change in PMR |
| 299 | Cetaxate HCl                                                                | 46386678 | NIHCC PLATE_04_F10 | no significant change in PMR |
| 300 | HTMT                                                                        | 46386998 | NIHCC PLATE_04_F11 | no significant change in PMR |
| 301 | Dexbrompheniramine Maleate                                                  | 46386574 | NIHCC PLATE_04_G02 | no significant change in PMR |
| 302 | 4-[6-(2-methoxyphenoxy)pyridazin-3-yl]-N-(4-methylphenyl)benzamide          | 46386916 | NIHCC PLATE_04_G03 | no significant change in PMR |
| 303 | 2(1H)-Pyrimidinone, 4-amino-1- D-arabinofuranosyl                           | 46386862 | NIHCC PLATE_04_G04 | no significant change in PMR |
| 304 | ItoprideHCl                                                                 | 46386560 | NIHCC PLATE_04_G05 | no significant change in PMR |
| 305 | Lidocaine                                                                   | 46386868 | NIHCC PLATE_04_G06 | no significant change in PMR |
| 306 | Epigallocatechin gallate                                                    | 46386901 | NIHCC PLATE_04_G07 | no significant change in PMR |
| 307 | Rifabutin                                                                   | 46386607 | NIHCC PLATE_04_G08 | no significant change in PMR |
| 308 | SR 57,227A                                                                  | 46386849 | NIHCC PLATE_04_G09 | no significant change in PMR |
| 309 | Trimebutine Maleate                                                         | 46386760 | NIHCC PLATE_04_G10 | no significant change in PMR |
| 310 | Icariin                                                                     | 46386578 | NIHCC PLATE_04_G11 | no significant change in PMR |
| 311 | Doxepin                                                                     | 46386803 | NIHCC PLATE_04_H02 | no significant change in PMR |
| 312 | Dexchlorpheniramine Maleate                                                 | 46386575 | NIHCC PLATE_04_H03 | no significant change in PMR |
| 313 | LY 171883,                                                                  | 46386838 | NIHCC PLATE_04_H04 | no significant change in PMR |
| 314 | Deprenaline (Selegiline)                                                    | 46386796 | NIHCC PLATE_04_H05 | no significant change in PMR |
| 315 | Benzeneacetic acid, Alpha                                                   | 46386794 | NIHCC PLATE_04_H06 | no significant change in PMR |
| 316 | Oxiranecarboxylic acid, 2-[6-(4-chlorophenoxy)hexyl]-, ethyl ester          | 46386895 | NIHCC PLATE_04_H07 | no significant change in PMR |
| 317 | Doxylamine succinate salt                                                   | 46386900 | NIHCC PLATE_04_H08 | no significant change in PMR |
| 318 | Tripelennamine HCl                                                          | 46386917 | NIHCC PLATE_04_H09 | no significant change in PMR |
| 319 | Linezolid                                                                   | 46386641 | NIHCC PLATE_04_H10 | no significant change in PMR |
| 320 | 5-Methoxytryptamine                                                         | 46387021 | NIHCC PLATE_04_H11 | no significant change in PMR |
| 321 | 6-Azauridine                                                                | 46386950 | NIHCC PLATE_05_A02 | no significant change in PMR |
| 322 | Rolitetracycline                                                            | 46386966 | NIHCC PLATE_05_A03 | no significant change in PMR |
| 323 | 4-[6-(3-methoxyphenoxy)pyridazin-3-yl]-N-[(3-methoxyphenyl)methyl]benzamide | 46386957 | NIHCC PLATE_05_A04 | no significant change in PMR |
| 324 | Taxifolin-(+/-)                                                             | 46386773 | NIHCC PLATE_05_A05 | no significant change in PMR |
| 325 | Oxaprozin                                                                   | 46386783 | NIHCC PLATE_05_A06 | no significant change in PMR |
| 326 | Rolipram                                                                    | 46386779 | NIHCC PLATE_05_A07 | no significant change in PMR |
| 327 | Rifaximin                                                                   | 46386615 | NIHCC PLATE_05_A08 | no significant change in PMR |
| 328 | 4-Thiazolidinecarboxylic acid, 2-oxo-, (R)                                  | 46386866 | NIHCC PLATE_05_A09 | no significant change in PMR |



|     |                                                                                                            |          |                    |                              |
|-----|------------------------------------------------------------------------------------------------------------|----------|--------------------|------------------------------|
| 329 | N-[(4-chlorophenyl)methyl]-3-[4-(2-methoxyphenoxy)pyrimidin-2-yl]benzamide                                 | 46386581 | NIHCC PLATE_05_A10 | no significant change in PMR |
| 330 | Lofexidine HCl                                                                                             | 46386875 | NIHCC PLATE_05_A11 | no significant change in PMR |
| 331 | Mepivacaine HCl                                                                                            | 46386949 | NIHCC PLATE_05_B02 | no significant change in PMR |
| 332 | Pirenperone                                                                                                | 46386967 | NIHCC PLATE_05_B03 | no significant change in PMR |
| 333 | Ritonavir                                                                                                  | 46386817 | NIHCC PLATE_05_B04 | no significant change in PMR |
| 334 | 1H-Imidazol-2-amine, N-(2,6-dichlorophenyl)-4,5-dihydro                                                    | 46386982 | NIHCC PLATE_05_B05 | no significant change in PMR |
| 335 | N-(4-methoxyphenyl)-4-(6-phenoxy-pyridazin-3-yl)benzamide                                                  | 46386993 | NIHCC PLATE_05_B06 | no significant change in PMR |
| 336 | Metylperon                                                                                                 | 46387011 | NIHCC PLATE_05_B07 | no significant change in PMR |
| 337 | Ebselen                                                                                                    | 46386980 | NIHCC PLATE_05_B08 | no significant change in PMR |
| 338 | Calcipotriol                                                                                               | 46386727 | NIHCC PLATE_05_B09 | no significant change in PMR |
| 339 | Chlordiazepoxide                                                                                           | 46386831 | NIHCC PLATE_05_B10 | no significant change in PMR |
| 340 | Raltitrexed                                                                                                | 46386823 | NIHCC PLATE_05_B11 | no significant change in PMR |
| 341 | Resveratrol                                                                                                | 46386962 | NIHCC PLATE_05_C02 | no significant change in PMR |
| 342 | Synephrine                                                                                                 | 46386970 | NIHCC PLATE_05_C03 | no significant change in PMR |
| 343 | Diazoxide                                                                                                  | 46386946 | NIHCC PLATE_05_C04 | no significant change in PMR |
| 344 | 1H-Imidazole-5-carboxylic acid, 1-(1-phenylethyl)-, ethyl ester, (R)                                       | 46386983 | NIHCC PLATE_05_C05 | no significant change in PMR |
| 345 | Benzo[a]phenanthridine-10,11-diol, 5,6,6a,7,8,12b-hexahydro-, trans                                        | 46386992 | NIHCC PLATE_05_C06 | no significant change in PMR |
| 346 | CCPA                                                                                                       | 46386935 | NIHCC PLATE_05_C07 | no significant change in PMR |
| 347 | 10H-Phenothiazine, 2-chloro-10-[3-(4-methyl-1-piperazinyl)propyl                                           | 46386924 | NIHCC PLATE_05_C08 | no significant change in PMR |
| 348 | Verapamil                                                                                                  | 46386795 | NIHCC PLATE_05_C09 | no significant change in PMR |
| 349 | Goserelin Acetate                                                                                          | 46386818 | NIHCC PLATE_05_C10 | no significant change in PMR |
| 350 | Methylandrostenediol                                                                                       | 46386580 | NIHCC PLATE_05_C11 | no significant change in PMR |
| 351 | 2-Chloroadenosine                                                                                          | 46386960 | NIHCC PLATE_05_D02 | no significant change in PMR |
| 352 | Delta-1-Hydrocortisone 21-Hemisuccinate Sodium Salt                                                        | 46386971 | NIHCC PLATE_05_D03 | no significant change in PMR |
| 353 | Omeprazole                                                                                                 | 46386973 | NIHCC PLATE_05_D04 | no significant change in PMR |
| 354 | 6H-Pyrido[2,3-b][1,4]benzodiazepin-6-one, 11-[[2-[(diethylamino)methyl]-1-piperidinyl]acetyl]-5,11-dihydro | 46386986 | NIHCC PLATE_05_D05 | no significant change in PMR |
| 355 | Dolasetron Mesylate                                                                                        | 46386881 | NIHCC PLATE_05_D06 | no significant change in PMR |
| 356 | Clotrimazole                                                                                               | 46386926 | NIHCC PLATE_05_D07 | no significant change in PMR |
| 357 | Ftorafur                                                                                                   | 46386579 | NIHCC PLATE_05_D08 | no significant change in PMR |
| 358 | Penciclovir                                                                                                | 46386598 | NIHCC PLATE_05_D09 | no significant change in PMR |
| 359 | Raclopride                                                                                                 | 46386981 | NIHCC PLATE_05_D10 | no significant change in PMR |
| 360 | Bestatin                                                                                                   | 46386830 | NIHCC PLATE_05_D11 | no significant change in PMR |
| 361 | Desoximetasone                                                                                             | 46386959 | NIHCC PLATE_05_E02 | no significant change in PMR |
| 362 | Beclomethasone                                                                                             | 46386972 | NIHCC PLATE_05_E03 | no significant change in PMR |
| 363 | Medroxyprogesterone                                                                                        | 46387018 | NIHCC PLATE_05_E04 | no significant change in PMR |
| 364 | Methotrexate [L-Glutamic acid, N-[4-[(2,4-pteridiny)l)methyl]methylamino]benzoyl]                          | 46386835 | NIHCC PLATE_05_E05 | no significant change in PMR |
| 365 | Calcitriol                                                                                                 | 46386784 | NIHCC PLATE_05_E06 | no significant change in PMR |
| 366 | Flurbiprofen                                                                                               | 46386788 | NIHCC PLATE_05_E07 | no significant change in PMR |
| 367 | Bifonazole                                                                                                 | 46386787 | NIHCC PLATE_05_E08 | no significant change in PMR |

|     |                                                                                                                           |          |                    |                              |
|-----|---------------------------------------------------------------------------------------------------------------------------|----------|--------------------|------------------------------|
| 368 | Cefixime Trihydrate                                                                                                       | 46386832 | NIHCC PLATE_05_E09 | no significant change in PMR |
| 369 | Pidotimod                                                                                                                 | 46386775 | NIHCC PLATE_05_E10 | no significant change in PMR |
| 370 | Tramadol                                                                                                                  | 46386884 | NIHCC PLATE_05_E11 | no significant change in PMR |
| 371 | Corticosterone                                                                                                            | 46386953 | NIHCC PLATE_05_F02 | no significant change in PMR |
| 372 | 3-Pyridinemethanol                                                                                                        | 46386968 | NIHCC PLATE_05_F03 | no significant change in PMR |
| 373 | Pinacidil monohydrate                                                                                                     | 46387019 | NIHCC PLATE_05_F04 | no significant change in PMR |
| 374 | 2H-Indol-2-one, 1,3-dihydro-1-phenyl-3,3-bis(4-pyridinylmethyl)                                                           | 46386985 | NIHCC PLATE_05_F05 | no significant change in PMR |
| 375 | GR 89696                                                                                                                  | 46386996 | NIHCC PLATE_05_F06 | no significant change in PMR |
| 376 | Isradipine                                                                                                                | 46386602 | NIHCC PLATE_05_F07 | no significant change in PMR |
| 377 | Nifedipine                                                                                                                | 46386790 | NIHCC PLATE_05_F08 | no significant change in PMR |
| 378 | Taxifolin-(+)                                                                                                             | 46386813 | NIHCC PLATE_05_F09 | no significant change in PMR |
| 379 | Levocetirizine                                                                                                            | 46386593 | NIHCC PLATE_05_F10 | no significant change in PMR |
| 380 | PD 81723                                                                                                                  | 46386976 | NIHCC PLATE_05_F11 | no significant change in PMR |
| 381 | Cortisone                                                                                                                 | 46386956 | NIHCC PLATE_05_G02 | no significant change in PMR |
| 382 | Mifepristone                                                                                                              | 46386955 | NIHCC PLATE_05_G03 | no significant change in PMR |
| 383 | Troxipide                                                                                                                 | 46386769 | NIHCC PLATE_05_G04 | no significant change in PMR |
| 384 | 1H-Indole-2-propanoic acid, 1-[(4-chlorophenyl)methyl]-3-[(1,1-dimethylethyl)thio]-Alpha,Alpha-dimethyl-5-(1-methylethyl) | 46386984 | NIHCC PLATE_05_G05 | no significant change in PMR |
| 385 | Flumazenil                                                                                                                | 46386776 | NIHCC PLATE_05_G06 | no significant change in PMR |
| 386 | Cisapride                                                                                                                 | 46386802 | NIHCC PLATE_05_G07 | no significant change in PMR |
| 387 | Fenpiverinium Bromide                                                                                                     | 46386658 | NIHCC PLATE_05_G08 | no significant change in PMR |
| 388 | Isoquercitrin                                                                                                             | 46386780 | NIHCC PLATE_05_G09 | no significant change in PMR |
| 389 | Telithromycin                                                                                                             | 46386829 | NIHCC PLATE_05_G10 | no significant change in PMR |
| 390 | Artemether                                                                                                                | 46386824 | NIHCC PLATE_05_G11 | no significant change in PMR |
| 391 | Reichsteins substance S                                                                                                   | 46386963 | NIHCC PLATE_05_H02 | no significant change in PMR |
| 392 | 5-Fluorocytosine                                                                                                          | 46386766 | NIHCC PLATE_05_H03 | no significant change in PMR |
| 393 | Lofepamine                                                                                                                | 46386649 | NIHCC PLATE_05_H04 | no significant change in PMR |
| 394 | Acetamide, 2-amino-N-(1-methyl-1,2-diphenylethyl)-, (+/-)                                                                 | 46386987 | NIHCC PLATE_05_H05 | no significant change in PMR |
| 395 | Indomethacin                                                                                                              | 46386809 | NIHCC PLATE_05_H06 | no significant change in PMR |
| 396 | Secoisolariciresinol                                                                                                      | 46386735 | NIHCC PLATE_05_H07 | no significant change in PMR |
| 397 | CGS 12066B                                                                                                                | 46386975 | NIHCC PLATE_05_H08 | no significant change in PMR |
| 398 | 3(2H)-Pyridazinone, 6-[4-(difluoromethoxy)-3-methoxyphenyl]                                                               | 46386923 | NIHCC PLATE_05_H09 | no significant change in PMR |
| 399 | Doxapram HCl                                                                                                              | 46386821 | NIHCC PLATE_05_H10 | no significant change in PMR |
| 400 | Cefdinir                                                                                                                  | 46386833 | NIHCC PLATE_05_H11 | no significant change in PMR |
| 401 | Miglitol                                                                                                                  | 46386758 | NIHCC PLATE_06_A02 | no significant change in PMR |
| 402 | Rosiglitazone Maleate                                                                                                     | 46386628 | NIHCC PLATE_06_A03 | no significant change in PMR |
| 403 | Piceid                                                                                                                    | 46386700 | NIHCC PLATE_06_A04 | no significant change in PMR |
| 404 | Flubendazole                                                                                                              | 46386742 | NIHCC PLATE_06_A05 | no significant change in PMR |
| 405 | Nitazoxanide                                                                                                              | 46386689 | NIHCC PLATE_06_A06 | no significant change in PMR |
| 406 | Lorazepam                                                                                                                 | 46386878 | NIHCC PLATE_06_A07 | no significant change in PMR |
| 407 | Memantine HCl                                                                                                             | 46386756 | NIHCC PLATE_06_B02 | no significant change in PMR |
| 408 | Ormetoprim                                                                                                                | 46386708 | NIHCC PLATE_06_B03 | no significant change in PMR |
| 409 | Lomifylline                                                                                                               | 46386754 | NIHCC PLATE_06_B04 | no significant change in PMR |

|     |                                                            |           |                    |                              |
|-----|------------------------------------------------------------|-----------|--------------------|------------------------------|
| 410 | Doxorubicin HCl                                            | 46386781  | NIHCC PLATE_06_B05 | no significant change in PMR |
| 411 | 1-(2-Methyl-5-nitro-imidazol-1-yl)-propan-2-ol             | 46386696  | NIHCC PLATE_06_B06 | no significant change in PMR |
| 412 | 3'-deoxyadenosine                                          | 46386791  | NIHCC PLATE_06_B07 | no significant change in PMR |
| 413 | Oxiconazole Nitrate                                        | 46386704  | NIHCC PLATE_06_C02 | no significant change in PMR |
| 414 | Fenoldopam Mesylate                                        | 46386722  | NIHCC PLATE_06_C03 | no significant change in PMR |
| 415 | Epirubicin HCl                                             | 46386577  | NIHCC PLATE_06_C04 | no significant change in PMR |
| 416 | Benazepril HCl                                             | 46386692  | NIHCC PLATE_06_C05 | no significant change in PMR |
| 417 | Mecillinam                                                 | 46386744  | NIHCC PLATE_06_C06 | no significant change in PMR |
| 418 | SB 205607                                                  | 46387006  | NIHCC PLATE_06_C07 | no significant change in PMR |
| 419 | Idebenone                                                  | 46386682  | NIHCC PLATE_06_D02 | no significant change in PMR |
| 420 | Carvedilol                                                 | 46386749  | NIHCC PLATE_06_D03 | no significant change in PMR |
| 421 | Ipriflavone                                                | 46386694  | NIHCC PLATE_06_D04 | no significant change in PMR |
| 422 | Phenprobamate                                              | 46386753  | NIHCC PLATE_06_D05 | no significant change in PMR |
| 423 | Efavirenz                                                  | 46386724  | NIHCC PLATE_06_D06 | no significant change in PMR |
| 424 | 5-Nonyloxytryptamine                                       | 46387012  | NIHCC PLATE_06_D07 | no significant change in PMR |
| 425 | Sertraline                                                 | 46386723  | NIHCC PLATE_06_E02 | no significant change in PMR |
| 426 | Nefazodone                                                 | 46386669  | NIHCC PLATE_06_E03 | no significant change in PMR |
| 427 | Benproperine Phosphate                                     | 46386752  | NIHCC PLATE_06_E04 | no significant change in PMR |
| 428 | Levosulpiride                                              | 46386685  | NIHCC PLATE_06_E05 | no significant change in PMR |
| 429 | Rosiglitazone HCl                                          | 46386626  | NIHCC PLATE_06_E06 | no significant change in PMR |
| 430 | Torasemide                                                 | 46386585  | NIHCC PLATE_06_E07 | no significant change in PMR |
| 431 | Bupropion HCl                                              | 46386703  | NIHCC PLATE_06_F02 | no significant change in PMR |
| 432 | Rufloxacin HCl                                             | 46386706  | NIHCC PLATE_06_F03 | no significant change in PMR |
| 433 | Amlodipine Base                                            | 46386686  | NIHCC PLATE_06_F04 | no significant change in PMR |
| 434 | Zileuton                                                   | 46386751  | NIHCC PLATE_06_F05 | no significant change in PMR |
| 435 | Acarbose                                                   | 46386746  | NIHCC PLATE_06_F06 | no significant change in PMR |
| 436 | Indinavir Sulphate                                         | 46386606  | NIHCC PLATE_06_G02 | no significant change in PMR |
| 437 | Pefloxacin Mesylate                                        | 46386589  | NIHCC PLATE_06_G03 | no significant change in PMR |
| 438 | Nisoldipine                                                | 46386699  | NIHCC PLATE_06_G04 | no significant change in PMR |
| 439 | Tranilast                                                  | 46386750  | NIHCC PLATE_06_G05 | no significant change in PMR |
| 440 | Levonorgestrel                                             | 46386677  | NIHCC PLATE_06_G06 | no significant change in PMR |
| 441 | Nateglinide                                                | 46386701  | NIHCC PLATE_06_H02 | no significant change in PMR |
| 442 | Irsogladine Maleate                                        | 46386698  | NIHCC PLATE_06_H03 | no significant change in PMR |
| 443 | Benidipine HCl                                             | 46386729  | NIHCC PLATE_06_H04 | no significant change in PMR |
| 444 | Moxifloxacin HCl                                           | 46386670  | NIHCC PLATE_06_H05 | no significant change in PMR |
| 445 | Pioglitazone HCl                                           | 46386618  | NIHCC PLATE_06_H06 | no significant change in PMR |
| 446 | Cortell                                                    | 104169955 | NIHCC PLATE_07_A02 | no significant change in PMR |
| 447 | Pindolol                                                   | 104169965 | NIHCC PLATE_07_A03 | no significant change in PMR |
| 448 | Prednisolone                                               | 104169971 | NIHCC PLATE_07_A04 | no significant change in PMR |
| 449 | Carbidopa                                                  | 104170225 | NIHCC PLATE_07_A05 | no significant change in PMR |
| 450 | Thiothixene                                                | 104170208 | NIHCC PLATE_07_A06 | no significant change in PMR |
| 451 | Penicillin V                                               | 104170199 | NIHCC PLATE_07_A07 | no significant change in PMR |
| 452 | Ethambutol                                                 | 104170193 | NIHCC PLATE_07_A08 | no significant change in PMR |
| 453 | Terazosin,                                                 | 104170187 | NIHCC PLATE_07_A09 | no significant change in PMR |
| 454 | 8-tert-butyl-6-(2-methoxypropyl)-6,9-diazaspiro[4.5]decane | 104170115 | NIHCC PLATE_07_A10 | no significant change in PMR |

|     |                                                                                        |           |                    |                              |
|-----|----------------------------------------------------------------------------------------|-----------|--------------------|------------------------------|
| 455 | Propylthiouracil                                                                       | 104170031 | NIHCC PLATE_07_A11 | no significant change in PMR |
| 456 | Hydrocortisone                                                                         | 104169954 | NIHCC PLATE_07_B02 | no significant change in PMR |
| 457 | Ofloxacin                                                                              | 104169964 | NIHCC PLATE_07_B03 | no significant change in PMR |
| 458 | N-[[3-(2-methoxypropyl)-2-methylimidazol-4-yl]methyl]ethanamine                        | 104169970 | NIHCC PLATE_07_B04 | no significant change in PMR |
| 459 | Sertraline                                                                             | 104170224 | NIHCC PLATE_07_B05 | no significant change in PMR |
| 460 | Clopidogrel                                                                            | 104170201 | NIHCC PLATE_07_B06 | no significant change in PMR |
| 461 | 16-(2-methoxypropyl)-8,16-diazadispiro[5.2.5 <sup>9</sup> .2 <sup>6</sup> ]hexadecane  | 104170192 | NIHCC PLATE_07_B07 | no significant change in PMR |
| 462 | Phenelzine                                                                             | 104170190 | NIHCC PLATE_07_B08 | no significant change in PMR |
| 463 | Ribavirin                                                                              | 104170186 | NIHCC PLATE_07_B09 | no significant change in PMR |
| 464 | Cromolyn Sodium                                                                        | 104170109 | NIHCC PLATE_07_B10 | no significant change in PMR |
| 465 | 2-cyclopropyl-1-(2-methoxypropyl)-2-methylpiperazine                                   | 104170030 | NIHCC PLATE_07_B11 | no significant change in PMR |
| 466 | Folic acid                                                                             | 104169953 | NIHCC PLATE_07_C02 | no significant change in PMR |
| 467 | N-[[1-(2-methoxypropyl)pyrazol-3-yl]methyl]ethanamine                                  | 104169961 | NIHCC PLATE_07_C03 | no significant change in PMR |
| 468 | Phenergan                                                                              | 104169969 | NIHCC PLATE_07_C04 | no significant change in PMR |
| 469 | Felodipine                                                                             | 104170219 | NIHCC PLATE_07_C05 | no significant change in PMR |
| 470 | 4-(Aminomethyl) Benzene Sulfonamide Acetate                                            | 104170207 | NIHCC PLATE_07_C06 | no significant change in PMR |
| 471 | 15-(2-methoxypropyl)-7,15-diazadispiro[4.2.5 <sup>8</sup> .2 <sup>5</sup> ]pentadecane | 104170191 | NIHCC PLATE_07_C07 | no significant change in PMR |
| 472 | Methylprednisolone                                                                     | 104170189 | NIHCC PLATE_07_C08 | no significant change in PMR |
| 473 | Albendazole                                                                            | 104170113 | NIHCC PLATE_07_C09 | decreased migration          |
| 474 | Terbutaline Sulfate                                                                    | 104170117 | NIHCC PLATE_07_C10 | no significant change in PMR |
| 475 | Pyridine-2-Aldoxime Methochloride                                                      | 104170029 | NIHCC PLATE_07_C11 | no significant change in PMR |
| 476 | 5-Fluorouracil                                                                         | 104169952 | NIHCC PLATE_07_D02 | no significant change in PMR |
| 477 | Metyrapone                                                                             | 104169960 | NIHCC PLATE_07_D03 | no significant change in PMR |
| 478 | 2-butan-2-yl-5,5-diethyl-1-(2-methoxypropyl)piperazine                                 | 104170222 | NIHCC PLATE_07_D04 | no significant change in PMR |
| 479 | 2-cyclohexyl-5-cyclopropyl-1-(2-methoxypropyl)-5-methylpiperazine                      | 104170213 | NIHCC PLATE_07_D05 | no significant change in PMR |
| 480 | Celecoxib                                                                              | 104170206 | NIHCC PLATE_07_D06 | no significant change in PMR |
| 481 | Rifapentine                                                                            | 104170198 | NIHCC PLATE_07_D07 | no significant change in PMR |
| 482 | Doxazosin                                                                              | 104170183 | NIHCC PLATE_07_D08 | no significant change in PMR |
| 483 | Azathioprine                                                                           | 104170112 | NIHCC PLATE_07_D09 | no significant change in PMR |
| 484 | Griseofulvin                                                                           | 104170114 | NIHCC PLATE_07_D10 | no significant change in PMR |
| 485 | 2,2-diethyl-1-(2-methoxypropyl)piperazine                                              | 104170028 | NIHCC PLATE_07_D11 | no significant change in PMR |
| 486 | 2-methoxy-N-[[1-(2-methoxypropyl)indol-6-yl]methyl]ethanamine                          | 104169951 | NIHCC PLATE_07_E02 | no significant change in PMR |
| 487 | Miconazole Nitrate                                                                     | 104169959 | NIHCC PLATE_07_E03 | no significant change in PMR |
| 488 | 5,5-diethyl-1-(2-methoxypropyl)-2-propan-2-ylpiperazine                                | 104170221 | NIHCC PLATE_07_E04 | no significant change in PMR |
| 489 | Aminoglutethimide                                                                      | 104170212 | NIHCC PLATE_07_E05 | no significant change in PMR |
| 490 | Lamivudine                                                                             | 104170203 | NIHCC PLATE_07_E06 | no significant change in PMR |
| 491 | Daunorubicin HCl                                                                       | 104170197 | NIHCC PLATE_07_E07 | no significant change in PMR |
| 492 | Stavudine                                                                              | 104170182 | NIHCC PLATE_07_E08 | no significant change in PMR |
| 493 | Mercaptopurine,                                                                        | 104170111 | NIHCC PLATE_07_E09 | no significant change in PMR |
| 494 | Micropenin                                                                             | 104170106 | NIHCC PLATE_07_E10 | no significant change in PMR |

|     |                                                                     |           |                    |                              |
|-----|---------------------------------------------------------------------|-----------|--------------------|------------------------------|
| 495 | Pro-Banthine                                                        | 104170027 | NIHCC PLATE_07_E11 | no significant change in PMR |
| 496 | Minocycline HCl                                                     | 104169958 | NIHCC PLATE_07_F02 | no significant change in PMR |
| 497 | DL-Penicillamine                                                    | 104169974 | NIHCC PLATE_07_F03 | no significant change in PMR |
| 498 | Fluorometholone                                                     | 104170223 | NIHCC PLATE_07_F04 | no significant change in PMR |
| 499 | Flunisolide                                                         | 104170214 | NIHCC PLATE_07_F05 | no significant change in PMR |
| 500 | Betamethasone                                                       | 104170205 | NIHCC PLATE_07_F06 | no significant change in PMR |
| 501 | Meloxicam                                                           | 104170196 | NIHCC PLATE_07_F07 | no significant change in PMR |
| 502 | Floxuridine                                                         | 104170121 | NIHCC PLATE_07_F08 | no significant change in PMR |
| 503 | 2-ethyl-1-(2-methoxypropyl)-5-(2-methylpropyl)piperazine            | 104170119 | NIHCC PLATE_07_F09 | no significant change in PMR |
| 504 | Methazolamide                                                       | 104170116 | NIHCC PLATE_07_F10 | no significant change in PMR |
| 505 | 1-(2-methoxypropyl)-2-phenylpiperazine                              | 104170026 | NIHCC PLATE_07_F11 | no significant change in PMR |
| 506 | N-[[1-(2-methoxypropyl)pyrazol-3-yl]methyl]propan-1-amine           | 104169962 | NIHCC PLATE_07_G02 | no significant change in PMR |
| 507 | Prednisone                                                          | 104169973 | NIHCC PLATE_07_G03 | no significant change in PMR |
| 508 | Quinapril HCl                                                       | 104170220 | NIHCC PLATE_07_G04 | no significant change in PMR |
| 509 | Lovastatin                                                          | 104170211 | NIHCC PLATE_07_G05 | no significant change in PMR |
| 510 | Ondansetron                                                         | 104170204 | NIHCC PLATE_07_G06 | no significant change in PMR |
| 511 | Dicloxacillin Sodium                                                | 104170195 | NIHCC PLATE_07_G07 | no significant change in PMR |
| 512 | Minoxidil                                                           | 104170184 | NIHCC PLATE_07_G08 | no significant change in PMR |
| 513 | Mupirocin                                                           | 104170118 | NIHCC PLATE_07_G09 | no significant change in PMR |
| 514 | Doxycycline                                                         | 104170107 | NIHCC PLATE_07_G10 | no significant change in PMR |
| 515 | 2-tert-butyl-1-(2-methoxypropyl)piperazine                          | 104170025 | NIHCC PLATE_07_G11 | no significant change in PMR |
| 516 | Disipal                                                             | 104169963 | NIHCC PLATE_07_H02 | no significant change in PMR |
| 517 | N-[[3-(2-methoxypropyl)-2-methylimidazol-4-yl]methyl]propan-2-amine | 104169972 | NIHCC PLATE_07_H03 | no significant change in PMR |
| 518 | Acyclovir                                                           | 104170215 | NIHCC PLATE_07_H04 | no significant change in PMR |
| 519 | Citalopram                                                          | 104170209 | NIHCC PLATE_07_H05 | no significant change in PMR |
| 520 | Gatifloxacin                                                        | 104170200 | NIHCC PLATE_07_H06 | no significant change in PMR |
| 521 | Cetirizine                                                          | 104170194 | NIHCC PLATE_07_H07 | no significant change in PMR |
| 522 | Chlorthalidone                                                      | 104170188 | NIHCC PLATE_07_H08 | no significant change in PMR |
| 523 | Priscoline                                                          | 104170110 | NIHCC PLATE_07_H09 | no significant change in PMR |
| 524 | 2-butan-2-yl-1-(2-methoxypropyl)piperazine                          | 104170032 | NIHCC PLATE_07_H10 | no significant change in PMR |
| 525 | Oxytetracycline hydrochloride                                       | 104170024 | NIHCC PLATE_07_H11 | no significant change in PMR |
| 526 | Norflex                                                             | 104170023 | NIHCC PLATE_08_A02 | no significant change in PMR |
| 527 | 2-benzyl-1-(2-methoxypropyl)-5-methylpiperazine                     | 104170048 | NIHCC PLATE_08_A03 | no significant change in PMR |
| 528 | Danazol                                                             | 104170055 | NIHCC PLATE_08_A04 | no significant change in PMR |
| 529 | Gemfibrozil                                                         | 104170063 | NIHCC PLATE_08_A05 | no significant change in PMR |
| 530 | Demeclocycline,                                                     | 104170101 | NIHCC PLATE_08_A06 | no significant change in PMR |
| 531 | 2-methoxy-N-[[1-(2-methoxypropyl)pyrazol-3-yl]methyl]ethanamine     | 104169967 | NIHCC PLATE_08_A07 | no significant change in PMR |
| 532 | Mebendazole                                                         | 104170137 | NIHCC PLATE_08_A08 | decreased migration          |
| 533 | Meclomem                                                            | 104170147 | NIHCC PLATE_08_A09 | no significant change in PMR |
| 534 | Moban                                                               | 104170156 | NIHCC PLATE_08_A10 | no significant change in PMR |
| 535 | 1-fluoro-2-(2-methoxypropylsulfonyl)benzene                         | 104169992 | NIHCC PLATE_08_A11 | no significant change in PMR |
| 536 | 2-ethyl-1-(2-methoxypropyl)-2,5-dimethylpiperazine                  | 104170041 | NIHCC PLATE_08_B02 | no significant change in PMR |
| 537 | Sulfisoxazole                                                       | 104170034 | NIHCC PLATE_08_B03 | no significant change in PMR |

|     |                                                                    |           |                    |                              |
|-----|--------------------------------------------------------------------|-----------|--------------------|------------------------------|
| 538 | 1-(2-methoxypropyl)-2-propan-2-yl-5-propylpiperazine               | 104170054 | NIHCC PLATE_08_B04 | no significant change in PMR |
| 539 | 2,2-diethyl-1-(2-methoxypropyl)-5-propylpiperazine                 | 104170062 | NIHCC PLATE_08_B05 | no significant change in PMR |
| 540 | Carbinoxamine Maleate                                              | 104170100 | NIHCC PLATE_08_B06 | no significant change in PMR |
| 541 | N-[[1-(2-methoxypropyl)pyrazol-3-yl]methyl]-2-methylpropan-1-amine | 104169966 | NIHCC PLATE_08_B07 | no significant change in PMR |
| 542 | Meclizine hydrochloride                                            | 104170138 | NIHCC PLATE_08_B08 | no significant change in PMR |
| 543 | Methoxsalen                                                        | 104170150 | NIHCC PLATE_08_B09 | no significant change in PMR |
| 544 | Fluvastatin                                                        | 104170157 | NIHCC PLATE_08_B10 | no significant change in PMR |
| 545 | Nitrofurantoin                                                     | 104170019 | NIHCC PLATE_08_B11 | no significant change in PMR |
| 546 | Theophylline                                                       | 104170040 | NIHCC PLATE_08_C02 | no significant change in PMR |
| 547 | Pronestyl                                                          | 104170033 | NIHCC PLATE_08_C03 | no significant change in PMR |
| 548 | N-[[1-(2-methoxypropyl)pyrazol-3-yl]methyl]-2-methylpropan-1-amine | 104170053 | NIHCC PLATE_08_C04 | no significant change in PMR |
| 549 | Flurbiprofen                                                       | 104170061 | NIHCC PLATE_08_C05 | no significant change in PMR |
| 550 | 6-[2-Ethoxy-1-Naphthamido]-Penicillin Sodium Salt                  | 104170104 | NIHCC PLATE_08_C06 | no significant change in PMR |
| 551 | Fludarabine                                                        | 104170131 | NIHCC PLATE_08_C07 | no significant change in PMR |
| 552 | Dilantin                                                           | 104170140 | NIHCC PLATE_08_C08 | no significant change in PMR |
| 553 | Fluconazole                                                        | 104170148 | NIHCC PLATE_08_C09 | no significant change in PMR |
| 554 | Triamterene                                                        | 104170042 | NIHCC PLATE_08_C10 | no significant change in PMR |
| 555 | Methyldopa                                                         | 104170018 | NIHCC PLATE_08_C11 | no significant change in PMR |
| 556 | Tetracycline                                                       | 104170039 | NIHCC PLATE_08_D02 | no significant change in PMR |
| 557 | 2-cyclohexyl-1-(2-methoxypropyl)-5-methylpiperazine                | 104170046 | NIHCC PLATE_08_D03 | no significant change in PMR |
| 558 | 1-(2-methoxypropyl)-5-methyl-2-(2-methylpropyl)piperazine          | 104170050 | NIHCC PLATE_08_D04 | no significant change in PMR |
| 559 | 1-(2-methoxypropyl)-2,2-dimethyl-5-propylpiperazine                | 104170060 | NIHCC PLATE_08_D05 | no significant change in PMR |
| 560 | 8-ethyl-6-(2-methoxypropyl)-6,9-diazaspiro[4.5]decane              | 104170103 | NIHCC PLATE_08_D06 | no significant change in PMR |
| 561 | Testosterone                                                       | 104170132 | NIHCC PLATE_08_D07 | no significant change in PMR |
| 562 | Miochol                                                            | 104170141 | NIHCC PLATE_08_D08 | no significant change in PMR |
| 563 | Metaproterenol                                                     | 104170149 | NIHCC PLATE_08_D09 | no significant change in PMR |
| 564 | 8-ethyl-6-(2-methoxypropyl)-6,9-diazaspiro[4.5]decane              | 104170035 | NIHCC PLATE_08_D10 | no significant change in PMR |
| 565 | 3-cyclopropyl-1-(2-methoxypropyl)-3-methylpiperazine               | 104170017 | NIHCC PLATE_08_D11 | no significant change in PMR |
| 566 | 2-cyclopropyl-1-(2-methoxypropyl)-5-methylpiperazine               | 104170038 | NIHCC PLATE_08_E02 | no significant change in PMR |
| 567 | Intropin                                                           | 104170043 | NIHCC PLATE_08_E03 | no significant change in PMR |
| 568 | Captopril                                                          | 104170052 | NIHCC PLATE_08_E04 | no significant change in PMR |
| 569 | 2-benzyl-1-(2-methoxypropyl)-5-propylpiperazine                    | 104170059 | NIHCC PLATE_08_E05 | no significant change in PMR |
| 570 | Westcort                                                           | 104170102 | NIHCC PLATE_08_E06 | no significant change in PMR |
| 571 | Isotretinoin                                                       | 104170133 | NIHCC PLATE_08_E07 | no significant change in PMR |
| 572 | Dexamethasone                                                      | 104170143 | NIHCC PLATE_08_E08 | no significant change in PMR |
| 573 | Etomidate                                                          | 104170155 | NIHCC PLATE_08_E09 | no significant change in PMR |
| 574 | Tizanidine hydrochloride                                           | 104170152 | NIHCC PLATE_08_E10 | no significant change in PMR |
| 575 | Cantil                                                             | 104170016 | NIHCC PLATE_08_E11 | no significant change in PMR |
| 576 | Sulfinpyrazone                                                     | 104170037 | NIHCC PLATE_08_F02 | no significant change in PMR |
| 577 | Adenine 9-beta;-D-arabinofuranoside                                | 104170045 | NIHCC PLATE_08_F03 | no significant change in PMR |
| 578 | Cefazolin Sodium                                                   | 104170051 | NIHCC PLATE_08_F04 | no significant change in PMR |

|     |                                                                                        |           |                    |                              |
|-----|----------------------------------------------------------------------------------------|-----------|--------------------|------------------------------|
| 579 | 17-Beta-Estradiol-17-Valerate                                                          | 104170058 | NIHCC PLATE_08_F05 | no significant change in PMR |
| 580 | Aminolevulinic Acid                                                                    | 104170099 | NIHCC PLATE_08_F06 | no significant change in PMR |
| 581 | Methimazole                                                                            | 104170134 | NIHCC PLATE_08_F07 | no significant change in PMR |
| 582 | Cogentin Mesylate                                                                      | 104170144 | NIHCC PLATE_08_F08 | no significant change in PMR |
| 583 | Chloramphenicol                                                                        | 104170151 | NIHCC PLATE_08_F09 | no significant change in PMR |
| 584 | Nicotinic Acid                                                                         | 104170022 | NIHCC PLATE_08_F10 | no significant change in PMR |
| 585 | 1-(2-methoxypropyl)-3-phenylpiperazine                                                 | 104170015 | NIHCC PLATE_08_F11 | no significant change in PMR |
| 586 | Sulfacetamide                                                                          | 104170036 | NIHCC PLATE_08_G02 | no significant change in PMR |
| 587 | Amoxapine                                                                              | 104170044 | NIHCC PLATE_08_G03 | no significant change in PMR |
| 588 | Hydrocortisone Hemisuccinate                                                           | 104170065 | NIHCC PLATE_08_G04 | no significant change in PMR |
| 589 | Digoxin                                                                                | 104170057 | NIHCC PLATE_08_G05 | decreased migration          |
| 590 | Thalidomide                                                                            | 104170098 | NIHCC PLATE_08_G06 | no significant change in PMR |
| 591 | Zonisamide                                                                             | 104170135 | NIHCC PLATE_08_G07 | no significant change in PMR |
| 592 | 5-butan-2-yl-2-tert-butyl-1-(2-methoxypropyl)piperazine                                | 104170145 | NIHCC PLATE_08_G08 | no significant change in PMR |
| 593 | Paroxetine                                                                             | 104170153 | NIHCC PLATE_08_G09 | no significant change in PMR |
| 594 | 2-ethyl-1-(2-methoxypropyl)-5-propan-2-ylpiperazine                                    | 104170021 | NIHCC PLATE_08_G10 | no significant change in PMR |
| 595 | Triclosan                                                                              | 104170014 | NIHCC PLATE_08_G11 | no significant change in PMR |
| 596 | 2-tert-butyl-1-(2-methoxypropyl)-5-methylpiperazine                                    | 104170049 | NIHCC PLATE_08_H02 | no significant change in PMR |
| 597 | (+)-CIS-DILTIAZEM HYDROCHLORIDE                                                        | 104170056 | NIHCC PLATE_08_H03 | no significant change in PMR |
| 598 | Glyburide                                                                              | 104170064 | NIHCC PLATE_08_H04 | no significant change in PMR |
| 599 | Primaquine Diphosphate                                                                 | 104170105 | NIHCC PLATE_08_H05 | no significant change in PMR |
| 600 | Prednisolone Acetate                                                                   | 104169968 | NIHCC PLATE_08_H06 | no significant change in PMR |
| 601 | 5-benzyl-2-cyclopropyl-1-(2-methoxypropyl)piperazine                                   | 104170136 | NIHCC PLATE_08_H07 | no significant change in PMR |
| 602 | 5-butan-2-yl-1-(2-methoxypropyl)-2-phenylpiperazine                                    | 104170146 | NIHCC PLATE_08_H08 | no significant change in PMR |
| 603 | Mirtazapine                                                                            | 104170154 | NIHCC PLATE_08_H09 | no significant change in PMR |
| 604 | 1-(2-methoxypropyl)-2-methyl-5-propan-2-ylpiperazine                                   | 104170020 | NIHCC PLATE_08_H10 | no significant change in PMR |
| 605 | Isoproterenol HCl                                                                      | 104170013 | NIHCC PLATE_08_H11 | no significant change in PMR |
| 606 | Chloroxine                                                                             | 104170003 | NIHCC PLATE_09_A02 | no significant change in PMR |
| 607 | Annoyltin                                                                              | 104169995 | NIHCC PLATE_09_A03 | no significant change in PMR |
| 608 | 1-[1-(2-methoxypropyl)-1,2,4-triazol-3-yl]-N-methylmethanamine                         | 104169984 | NIHCC PLATE_09_A04 | no significant change in PMR |
| 609 | Quinidine hydrochloride monohydrate                                                    | 104169976 | NIHCC PLATE_09_A05 | no significant change in PMR |
| 610 | Enalapril Maleate                                                                      | 104170123 | NIHCC PLATE_09_A06 | no significant change in PMR |
| 611 | Naloxone HCl                                                                           | 104170085 | NIHCC PLATE_09_A07 | no significant change in PMR |
| 612 | Azithromycin                                                                           | 104170210 | NIHCC PLATE_09_A08 | no significant change in PMR |
| 613 | Urecholine                                                                             | 104170158 | NIHCC PLATE_09_A09 | no significant change in PMR |
| 614 | 5-Azacytidine                                                                          | 104170170 | NIHCC PLATE_09_A10 | no significant change in PMR |
| 615 | 14-(2-methoxypropyl)-7,14-diazadispiro[4.2.4 <sup>8</sup> .2 <sup>5</sup> ]tetradecane | 104170179 | NIHCC PLATE_09_A11 | no significant change in PMR |
| 616 | Bentyl                                                                                 | 104170002 | NIHCC PLATE_09_B02 | no significant change in PMR |
| 617 | Atropine                                                                               | 104169991 | NIHCC PLATE_09_B03 | no significant change in PMR |
| 618 | L-Thyroxine                                                                            | 104169983 | NIHCC PLATE_09_B04 | no significant change in PMR |
| 619 | Piperacillin Sodium                                                                    | 104169975 | NIHCC PLATE_09_B05 | no significant change in PMR |
| 620 | Ramipiril                                                                              | 104170125 | NIHCC PLATE_09_B06 | no significant change in PMR |

|     |                                                                           |           |                    |                              |
|-----|---------------------------------------------------------------------------|-----------|--------------------|------------------------------|
| 621 | Dantrolene                                                                | 104170142 | NIHCC PLATE_09_B07 | no significant change in PMR |
| 622 | N-[[1-(2-methoxypropyl)indol-6-yl]methyl]-2-methylpropan-1-amine          | 104169950 | NIHCC PLATE_09_B08 | no significant change in PMR |
| 623 | Cytosan                                                                   | 104170160 | NIHCC PLATE_09_B09 | no significant change in PMR |
| 624 | Amoxicillin Crystalline                                                   | 104170168 | NIHCC PLATE_09_B10 | no significant change in PMR |
| 625 | Carbamazepine                                                             | 104170177 | NIHCC PLATE_09_B11 | no significant change in PMR |
| 626 | Cimetidine                                                                | 104169999 | NIHCC PLATE_09_C02 | no significant change in PMR |
| 627 | N-[[1-(2-methoxypropyl)-1,2,4-triazol-3-yl]methyl]-2-methylpropan-1-amine | 104169990 | NIHCC PLATE_09_C03 | no significant change in PMR |
| 628 | Tyzine                                                                    | 104169982 | NIHCC PLATE_09_C04 | no significant change in PMR |
| 629 | Clomid                                                                    | 104170129 | NIHCC PLATE_09_C05 | no significant change in PMR |
| 630 | Mefloquine hydrochloride,                                                 | 104170120 | NIHCC PLATE_09_C06 | no significant change in PMR |
| 631 | 3,5,3'-Triiodothyronine                                                   | 104169993 | NIHCC PLATE_09_C07 | no significant change in PMR |
| 632 | Podofilox                                                                 | 104170173 | NIHCC PLATE_09_C08 | decreased migration          |
| 633 | Cefuroxime                                                                | 104170159 | NIHCC PLATE_09_C09 | no significant change in PMR |
| 634 | 9-(2-methoxypropyl)-8-methyl-6,9-diazaspiro[4.5]decane                    | 104170167 | NIHCC PLATE_09_C10 | no significant change in PMR |
| 635 | 8-cyclohexyl-9-(2-methoxypropyl)-6,9-diazaspiro[4.5]decane                | 104170176 | NIHCC PLATE_09_C11 | no significant change in PMR |
| 636 | Chlorothiazide                                                            | 104169998 | NIHCC PLATE_09_D02 | no significant change in PMR |
| 637 | N-[[1-(2-methoxypropyl)-1,2,4-triazol-3-yl]methyl]-2-methylpropan-2-amine | 104169989 | NIHCC PLATE_09_D03 | no significant change in PMR |
| 638 | N-[[1-(2-methoxypropyl)indol-7-yl]methyl]-2-methylpropan-2-amine          | 104169981 | NIHCC PLATE_09_D04 | no significant change in PMR |
| 639 | Amcinonide                                                                | 104170128 | NIHCC PLATE_09_D05 | no significant change in PMR |
| 640 | Depo-Medrol                                                               | 104170126 | NIHCC PLATE_09_D06 | no significant change in PMR |
| 641 | 1-fluoro-4-(2-methoxypropylsulfonyl)benzene                               | 104169994 | NIHCC PLATE_09_D07 | no significant change in PMR |
| 642 | Eszopiclone,                                                              | 104170161 | NIHCC PLATE_09_D08 | no significant change in PMR |
| 643 | D-Cycloserine                                                             | 104170174 | NIHCC PLATE_09_D09 | no significant change in PMR |
| 644 | Ampicillin Sodium                                                         | 104170166 | NIHCC PLATE_09_D10 | no significant change in PMR |
| 645 | Cortisone Acetate                                                         | 104170175 | NIHCC PLATE_09_D11 | no significant change in PMR |
| 646 | 3-(2-methoxypropoxy)pyridine                                              | 104170001 | NIHCC PLATE_09_E02 | no significant change in PMR |
| 647 | Warfarin Sodium                                                           | 104169988 | NIHCC PLATE_09_E03 | no significant change in PMR |
| 648 | Spironolactone                                                            | 104169980 | NIHCC PLATE_09_E04 | no significant change in PMR |
| 649 | Mitoxantrone                                                              | 104170122 | NIHCC PLATE_09_E05 | decreased migration          |
| 650 | (+/-)-Epinephrine hydrochloride                                           | 104170169 | NIHCC PLATE_09_E06 | no significant change in PMR |
| 651 | Tamoxifen                                                                 | 104170047 | NIHCC PLATE_09_E07 | no significant change in PMR |
| 652 | 3-ethyl-1-(2-methoxypropyl)-3-methyl-1,4-diazaspiro[5.5]undecane          | 104170165 | NIHCC PLATE_09_E08 | no significant change in PMR |
| 653 | N-[[1-(2-methoxypropyl)indol-6-yl]methyl]propan-2-amine                   | 104169947 | NIHCC PLATE_09_E09 | no significant change in PMR |
| 654 | N-[[1-(2-methoxypropyl)indol-6-yl]methyl]propan-1-amine                   | 104169946 | NIHCC PLATE_09_E10 | no significant change in PMR |
| 655 | Filutamide                                                                | 104169949 | NIHCC PLATE_09_E11 | no significant change in PMR |
| 656 | Carisoprodol                                                              | 104170000 | NIHCC PLATE_09_F02 | no significant change in PMR |
| 657 | Symmetrel                                                                 | 104169987 | NIHCC PLATE_09_F03 | no significant change in PMR |
| 658 | Trans-retinoic acid                                                       | 104169979 | NIHCC PLATE_09_F04 | no significant change in PMR |
| 659 | Beclomethasone dipropionate                                               | 104170108 | NIHCC PLATE_09_F05 | no significant change in PMR |
| 660 | Memantine hydrochloride                                                   | 104170178 | NIHCC PLATE_09_F06 | no significant change in PMR |
| 661 | Simvastatin                                                               | 104170217 | NIHCC PLATE_09_F07 | no significant change in PMR |



|     |                                                                                        |           |                    |                              |
|-----|----------------------------------------------------------------------------------------|-----------|--------------------|------------------------------|
| 662 | 8-ethyl-6-(2-methoxypropyl)-8-methyl-6,9-diazaspiro[4.5]decane                         | 104170164 | NIHCC PLATE_09_F08 | no significant change in PMR |
| 663 | Bendrofluzide                                                                          | 104170162 | NIHCC PLATE_09_F09 | no significant change in PMR |
| 664 | N-[[1-(2-methoxypropyl)indol-6-yl]methyl]ethanamine                                    | 104169945 | NIHCC PLATE_09_F10 | no significant change in PMR |
| 665 | N-[[1-(2-methoxypropyl)indol-6-yl]methyl]cyclopropanamine                              | 104169948 | NIHCC PLATE_09_F11 | no significant change in PMR |
| 666 | Chlorzoxazone                                                                          | 104169997 | NIHCC PLATE_09_G02 | no significant change in PMR |
| 667 | N-[[1-(2-methoxypropyl)-1,2,4-triazol-3-yl]methyl]propan-1-amine                       | 104169986 | NIHCC PLATE_09_G03 | no significant change in PMR |
| 668 | Rifampicin                                                                             | 104169978 | NIHCC PLATE_09_G04 | no significant change in PMR |
| 669 | (+/-)-Norepinephrine HCl                                                               | 104170127 | NIHCC PLATE_09_G05 | no significant change in PMR |
| 670 | 3-butan-2-yl-4-(2-methoxypropyl)-1,4-diazaspiro[5.5]undecane                           | 104170185 | NIHCC PLATE_09_G06 | no significant change in PMR |
| 671 | 8-cyclopropyl-6-(2-methoxypropyl)-8-methyl-6,9-diazaspiro[4.5]decane                   | 104170216 | NIHCC PLATE_09_G07 | no significant change in PMR |
| 672 | 2,5-diethyl-1-(2-methoxypropyl)-2,5-dimethylpiperazine                                 | 104170163 | NIHCC PLATE_09_G08 | no significant change in PMR |
| 673 | Buspar                                                                                 | 104170171 | NIHCC PLATE_09_G09 | no significant change in PMR |
| 674 | 8-cyclopropyl-9-(2-methoxypropyl)-8-methyl-6,9-diazaspiro[4.5]decane                   | 104170181 | NIHCC PLATE_09_G10 | no significant change in PMR |
| 675 | N-[[2-(2-methoxypropyl)pyrazol-3-yl]methyl]-2-methylpropan-2-amine                     | 104169957 | NIHCC PLATE_09_G11 | no significant change in PMR |
| 676 | Busulfan                                                                               | 104169996 | NIHCC PLATE_09_H02 | no significant change in PMR |
| 677 | Ursodeoxycholic Acid                                                                   | 104169985 | NIHCC PLATE_09_H03 | no significant change in PMR |
| 678 | 1-[1-(2-methoxypropyl)indol-7-yl]-N-methylmethanamine                                  | 104169977 | NIHCC PLATE_09_H04 | no significant change in PMR |
| 679 | 2-tert-butyl-1-(2-methoxypropyl)-5-(2-methylpropyl)piperazine                          | 104170124 | NIHCC PLATE_09_H05 | no significant change in PMR |
| 680 | Cefotaxime Soidum                                                                      | 104170202 | NIHCC PLATE_09_H06 | no significant change in PMR |
| 681 | Rifabutin                                                                              | 104170218 | NIHCC PLATE_09_H07 | no significant change in PMR |
| 682 | Phentolamine Mono-hydrochloride                                                        | 104170130 | NIHCC PLATE_09_H08 | no significant change in PMR |
| 683 | 8-cyclopropyl-9-(2-methoxypropyl)-6,9-diazaspiro[4.5]decane                            | 104170172 | NIHCC PLATE_09_H09 | no significant change in PMR |
| 684 | 14-(2-methoxypropyl)-6,14-diazadispiro[4.2.5 <sup>8</sup> .2 <sup>5</sup> ]pentadecane | 104170180 | NIHCC PLATE_09_H10 | no significant change in PMR |
| 685 | N-[[2-(2-methoxypropyl)pyrazol-3-yl]methyl]cyclopropanamine                            | 104169956 | NIHCC PLATE_09_H11 | no significant change in PMR |
| 686 | Duvadilan                                                                              | 104170012 | NIHCC PLATE_10_A02 | no significant change in PMR |
| 687 | 3-ethyl-1-(2-methoxypropyl)piperazine                                                  | 104170004 | NIHCC PLATE_10_A03 | no significant change in PMR |
| 688 | Proxymetacaine                                                                         | 104170084 | NIHCC PLATE_10_A04 | no significant change in PMR |
| 689 | 2-butan-2-yl-1-(2-methoxypropyl)-5,5-dimethylpiperazine                                | 104170082 | NIHCC PLATE_10_A05 | no significant change in PMR |
| 690 | 1-(2-methoxypropyl)-2,5,5-trimethylpiperazine                                          | 104170078 | NIHCC PLATE_10_A06 | no significant change in PMR |
| 691 | Isoniazid                                                                              | 104170011 | NIHCC PLATE_10_B02 | no significant change in PMR |
| 692 | 1-(2-methoxypropyl)-2,5,5-trimethyl-2-phenylpiperazine                                 | 104170092 | NIHCC PLATE_10_B03 | no significant change in PMR |
| 693 | S(-)-Timolol maleate                                                                   | 104170090 | NIHCC PLATE_10_B04 | no significant change in PMR |
| 694 | Pfizerpen                                                                              | 104170081 | NIHCC PLATE_10_B05 | no significant change in PMR |
| 695 | 19-Norethindrone                                                                       | 104170074 | NIHCC PLATE_10_B06 | no significant change in PMR |
| 696 | 1-(2-methoxypropyl)-3,3-dimethylpiperazine                                             | 104170010 | NIHCC PLATE_10_C02 | no significant change in PMR |
| 697 | Thiabendazole                                                                          | 104170091 | NIHCC PLATE_10_C03 | no significant change in PMR |
| 698 | 2-ethyl-1-(2-methoxypropyl)-2,5,5-trimethylpiperazine                                  | 104170089 | NIHCC PLATE_10_C04 | no significant change in PMR |

|     |                                                                |           |                    |                              |
|-----|----------------------------------------------------------------|-----------|--------------------|------------------------------|
| 699 | Rythmol                                                        | 104170080 | NIHCC PLATE_10_C05 | no significant change in PMR |
| 700 | 19-Norethindorne Acetate                                       | 104170073 | NIHCC PLATE_10_C06 | no significant change in PMR |
| 701 | Vistaril Pamoate                                               | 104170009 | NIHCC PLATE_10_D02 | no significant change in PMR |
| 702 | 6-alpha-methyl-11beta-hydroxyprogesterone                      | 104170097 | NIHCC PLATE_10_D03 | no significant change in PMR |
| 703 | 1-(2-methoxypropyl)-2,2,5,5-tetramethylpiperazine              | 104170088 | NIHCC PLATE_10_D04 | no significant change in PMR |
| 704 | Cardene                                                        | 104170076 | NIHCC PLATE_10_D05 | no significant change in PMR |
| 705 | 2-tert-butyl-1-(2-methoxypropyl)-5-propan-2-ylpiperazine       | 104170069 | NIHCC PLATE_10_D06 | no significant change in PMR |
| 706 | 3-tert-butyl-1-(2-methoxypropyl)piperazine                     | 104170008 | NIHCC PLATE_10_E02 | no significant change in PMR |
| 707 | Dibenzylidine                                                  | 104170096 | NIHCC PLATE_10_E03 | no significant change in PMR |
| 708 | 2-benzyl-1-(2-methoxypropyl)-5,5-dimethylpiperazine            | 104170087 | NIHCC PLATE_10_E04 | no significant change in PMR |
| 709 | Nicotine                                                       | 104170075 | NIHCC PLATE_10_E05 | no significant change in PMR |
| 710 | Nabumetone                                                     | 104170077 | NIHCC PLATE_10_E06 | no significant change in PMR |
| 711 | Methocarbamol                                                  | 104170007 | NIHCC PLATE_10_F02 | no significant change in PMR |
| 712 | Phylloquinone                                                  | 104170094 | NIHCC PLATE_10_F03 | no significant change in PMR |
| 713 | Spectinomycin Dihydrochloride Pentahydrate                     | 104170086 | NIHCC PLATE_10_F04 | no significant change in PMR |
| 714 | 1-(2-methoxypropyl)-2-(2-methylpropyl)-5-propan-2-ylpiperazine | 104170068 | NIHCC PLATE_10_F05 | no significant change in PMR |
| 715 | Medroxyprogesterone 17-acetate                                 | 104170072 | NIHCC PLATE_10_F06 | no significant change in PMR |
| 716 | 1-(2-methoxypropyl)-3-propan-2-ylpiperazine                    | 104170006 | NIHCC PLATE_10_G02 | no significant change in PMR |
| 717 | 5-ethyl-1-(2-methoxypropyl)-2-methylpiperazine                 | 104170093 | NIHCC PLATE_10_G03 | no significant change in PMR |
| 718 | 1-(2-methoxypropyl)-2,5-di(propan-2-yl)piperazine              | 104170066 | NIHCC PLATE_10_G04 | no significant change in PMR |
| 719 | Ipratropium Bromide                                            | 104170067 | NIHCC PLATE_10_G05 | no significant change in PMR |
| 720 | Pro-Amatine                                                    | 104170071 | NIHCC PLATE_10_G06 | no significant change in PMR |
| 721 | Econazole Nitrate                                              | 104170005 | NIHCC PLATE_10_H02 | no significant change in PMR |
| 722 | Eryped                                                         | 104170095 | NIHCC PLATE_10_H03 | no significant change in PMR |
| 723 | 1-(2-methoxypropyl)-5,5-dimethyl-2-(2-methylpropyl)piperazine  | 104170083 | NIHCC PLATE_10_H04 | no significant change in PMR |
| 724 | Mestinon                                                       | 104170079 | NIHCC PLATE_10_H05 | no significant change in PMR |
| 725 | 1-(2-methoxypropyl)-2-phenyl-5-propan-2-ylpiperazine           | 104170070 | NIHCC PLATE_10_H06 | no significant change in PMR |

**Notes:** 725 compounds in NIH clinical collection screened. All compounds were examined were preliminary screened at a concentration of 10  $\mu$ M (**Table 2**). Preliminary positive results were screened in serial concentrations of 1, 5, and 10  $\mu$ M. (**Table 1**). Drugbank ([www.drugbank.ca](http://www.drugbank.ca)) was used to further analyze compounds that were deemed as positive hits in the preliminary screen (1). Pubchem ID (<https://pubchem.ncbi.nlm.nih.gov/>); PMR, podocyte migration rate;

## REFERENCES

1. Wishart DS, Knox C, Guo AC, Shrivastava S, Hassanali M, Stothard P, Chang Z, and Woolsey J. DrugBank: a comprehensive resource for in silico drug discovery and exploration. *Nucleic acids research* 34: D668-672, 2006.
